# Supplementary material for: Core and accessory genomic traits of Vibrio cholerae O1 drive lineage transmission and disease severity
Source: Nat Commun. 2024 Sep 23;15:8231. doi: 10.1038/s41467-024-52238-0 (PMC11420230; doi:10.1038/s41467-024-52238-0)
Supplement: Supplementary file 8 — Supplementary Data 5 [file 41467_2024_52238_MOESM8_ESM.xlsx]

## Sheet: accessorygene_presenceabsence
Cohort (Public/Our study	Sample ID		Collection year	Lineage	Accessory gene (prokka annotion gene name given)
		ENA accession			adh	lon_3	endA	hdfR_4	bcr_2	mepM_3	aer_3	hlyA_1	mrr	mcrC	tetA	tetR
Our study	NGICDV-033	SRR26202685	2016	BD-1.2	1	1	1	0	0	0	0	0	0	0	0	0
Our study	NGICDV-050	SRR26202669	2017	BD-1.2	1	1	1	1	1	0	0	0	0	0	0	0
Our study	NGICDV-061	SRR26202660	2018	BD-1.2	1	1	1	1	1	0	0	0	0	0	0	0
Our study	NGICDV-062	SRR26202659	2018	BD-1.2	1	1	1	1	1	0	0	0	0	0	0	0
Our study	NGICDV-063	SRR26202658	2018	BD-1.2	1	1	1	1	1	0	0	0	0	0	0	0
Our study	NGICDV-065	SRR26202657	2018	BD-1.2	1	1	1	1	1	0	0	0	0	0	0	0
Our study	NGICDV-071	SRR26202654	2018	BD-1.2	1	1	1	1	1	0	0	0	0	0	0	0
Our study	NGICDV-072	SRR26202652	2018	BD-1.2	1	1	1	1	1	0	0	0	0	0	0	0
Our study	NGICDV-073	SRR26202651	2018	BD-1.2	1	1	1	1	1	0	0	0	0	0	0	0
Our study	NGICDV-074	SRR26202650	2018	BD-1.2	1	1	1	1	1	0	0	0	0	0	0	0
Our study	NGICDV-075	SRR26202649	2018	BD-1.2	1	1	1	1	1	0	0	0	0	0	0	0
Our study	NGICDV-076	SRR26202648	2018	BD-1.2	1	1	1	1	1	0	0	0	0	0	0	0
Our study	NGICDV-077	SRR26202647	2018	BD-1.2	1	1	1	1	1	0	0	0	0	0	0	0
Our study	NGICDV-078	SRR26202646	2018	BD-1.2	1	1	1	1	1	0	0	0	0	0	0	0
Our study	NGICDV-079	SRR26202645	2018	BD-1.2	1	1	1	1	1	0	0	0	0	0	0	0
Our study	NGICDV-080	SRR26202644	2018	BD-1.2	1	1	1	1	1	0	0	0	0	0	0	0
Our study	NGICDV-082	SRR26202641	2019	BD-1.2	1	1	1	1	1	0	0	0	0	0	0	0
Our study	NGICDV-085	SRR26202639	2019	BD-1.2	1	1	1	1	1	0	0	0	0	0	0	0
Our study	NGICDV-086	SRR26202638	2019	BD-1.2	1	1	1	1	1	0	0	0	0	0	0	0
Our study	NGICDV-087	SRR26202637	2019	BD-1.2	1	1	1	1	1	0	0	0	0	0	0	0
Our study	NGICDV-088	SRR26202636	2019	BD-1.2	1	1	1	1	1	0	0	0	0	0	0	0
Our study	NGICDV-090	SRR26202635	2019	BD-1.2	1	1	1	1	1	0	0	0	0	0	0	0
Our study	NGICDV-091	SRR26202634	2019	BD-1.2	1	1	1	1	1	0	0	0	0	0	0	0
Our study	NGICDV-092	SRR26202633	2019	BD-1.2	1	1	1	1	1	0	0	0	0	0	0	0
Our study	NGICDV-095	SRR26202632	2019	BD-1.2	1	1	1	1	1	0	0	0	0	0	0	0
Our study	NGICDV-096	SRR26202630	2019	BD-1.2	1	1	1	1	1	0	0	0	0	0	0	0
Our study	NGICDV-097	SRR26202629	2019	BD-1.2	1	1	1	1	1	0	0	0	0	0	0	0
Our study	NGICDV-098	SRR26202628	2019	BD-1.2	1	1	1	1	1	0	0	0	0	0	0	0
Our study	NGIEDV-007	SRR26202627	2020	BD-1.2	1	1	1	1	1	0	0	0	0	0	0	0
Our study	NGIEDV-017	SRR26202626	2020	BD-1.2	1	1	1	1	1	0	0	0	0	0	0	0
Our study	NGIEDV-025	SRR26202625	2020	BD-1.2	1	1	1	1	1	0	0	0	0	0	0	0
Our study	NGIEDV-027	SRR26202624	2020	BD-1.2	1	1	1	1	1	0	0	0	0	0	0	0
Our study	NGIEDV-028	SRR26202623	2020	BD-1.2	1	1	1	1	1	0	0	0	0	0	0	0
Our study	NGIEDV-029	SRR26202622	2020	BD-1.2	1	1	1	1	1	0	0	0	0	0	0	0
Our study	NGIEDV-039	SRR26202621	2020	BD-1.2	1	1	1	1	1	0	0	0	0	0	0	0
Our study	NGIEDV-044	SRR26202619	2020	BD-1.2	1	1	1	1	1	0	0	0	0	0	0	0
Our study	NGIEDV-046	SRR26202618	2020	BD-1.2	1	1	1	1	1	0	0	0	0	0	0	0
Our study	NGIEDV-047	SRR26202617	2020	BD-1.2	1	1	1	1	1	0	0	0	0	0	0	0
Our study	NGIEDV-048	SRR26202616	2020	BD-1.2	1	1	1	1	1	0	0	0	0	0	0	0
Our study	NGIEDV-049	SRR26202615	2020	BD-1.2	1	1	1	1	1	0	0	0	0	0	0	0
Our study	NGIEDV-057	SRR26202614	2020	BD-1.2	1	1	1	1	1	0	0	0	0	0	0	0
Our study	NGIEDV-058	SRR26202613	2020	BD-1.2	1	1	1	1	1	0	0	0	0	0	0	0
Our study	NGIEDV-059	SRR26202612	2020	BD-1.2	1	1	1	1	1	0	0	0	0	0	0	0
Our study	NGIEDV-060	SRR26202611	2020	BD-1.2	1	1	1	1	1	0	0	0	0	0	0	0
Our study	NGIEDV-061	SRR26202610	2020	BD-1.2	1	1	1	1	1	0	0	0	0	0	0	0
Our study	NGIEDV-062	SRR26202608	2020	BD-1.2	1	1	1	1	1	0	0	0	0	0	0	0
Our study	NGIEDV-063	SRR26202607	2020	BD-1.2	1	1	1	1	1	0	0	0	0	0	0	0
Our study	NGIEDV-064	SRR26202606	2021	BD-1.2	1	1	1	0	0	0	0	0	0	0	0	0
Our study	NGIEDV-065	SRR26202605	2021	BD-1.2	1	1	1	1	1	0	0	0	0	0	0	0
Our study	NGIEDV-066	SRR26202604	2021	BD-1.2	1	1	1	1	1	0	0	0	0	0	0	0
Our study	NGIEDV-067	SRR26202603	2021	BD-1.2	1	1	1	1	1	0	0	0	0	0	0	0
Our study	NGIEDV-068	SRR26202602	2021	BD-1.2	1	1	1	1	1	0	0	0	0	0	0	0
Our study	NGIEDV-069	SRR26202601	2021	BD-1.2	1	1	1	1	1	0	0	0	0	0	0	0
Our study	NGIEDV-070	SRR26202600	2021	BD-1.2	1	1	1	1	1	0	0	0	0	0	0	0
Our study	NGIEDV-074	SRR26202599	2021	BD-1.2	1	1	1	1	1	0	0	0	0	0	0	0
Our study	NGIEDV-075	SRR26202724	2021	BD-1.2	1	1	1	1	1	0	0	0	0	0	0	0
Our study	NGIEDV-076	SRR26202723	2021	BD-1.2	1	1	1	1	1	0	0	0	0	0	0	0
Our study	NGIEDV-077	SRR26202722	2021	BD-1.2	1	1	1	1	1	0	0	0	0	0	0	0
Our study	NGIEDV-078	SRR26202721	2021	BD-1.2	1	1	1	1	1	0	0	0	0	0	0	0
Our study	NGIEDV-079	SRR26202720	2021	BD-1.2	1	1	1	1	1	0	0	0	0	0	0	0
Our study	NGIEDV-080	SRR26202719	2021	BD-1.2	1	1	1	1	1	0	0	0	0	0	0	0
Our study	NGIEDV-082	SRR26202718	2021	BD-1.2	1	1	1	1	1	0	0	0	0	0	0	0
Our study	NGIEDV-086	SRR26202717	2021	BD-1.2	1	1	1	1	1	0	0	0	0	0	0	0
Our study	NGIEDV-087	SRR26202716	2021	BD-1.2	1	1	1	1	1	0	0	0	0	0	0	0
Our study	NGIEDV-088	SRR26202715	2021	BD-1.2	1	1	1	1	1	0	0	0	0	0	0	0
Our study	NGIEDV-089	SRR26202713	2021	BD-1.2	1	1	1	1	1	0	0	0	0	0	0	0
Our study	NGIEDV-090	SRR26202712	2021	BD-1.2	1	1	1	1	1	0	0	0	0	0	0	0
Our study	NGIEDV-093	SRR26202711	2021	BD-1.2	1	1	1	1	1	0	0	0	0	0	0	0
Our study	NGIEDV-094	SRR26202710	2021	BD-1.2	1	1	1	1	1	0	0	0	0	0	0	0
Our study	NGIEDV-095	SRR26202709	2021	BD-1.2	1	1	1	1	1	0	0	0	0	0	0	0
Our study	NGIEDV-096	SRR26202708	2021	BD-1.2	1	1	1	1	1	0	0	0	0	0	0	0
Our study	NGIEDV-097	SRR26202707	2021	BD-1.2	1	1	1	1	1	0	0	0	0	0	0	0
Our study	NGIEDV-100	SRR26202706	2021	BD-1.2	1	1	1	1	1	0	0	0	0	0	0	0
Our study	NGIEDV-102	SRR26202705	2021	BD-1.2	1	1	1	1	1	0	0	0	0	0	0	0
Our study	NGIEDV-103	SRR26202704	2021	BD-1.2	1	1	1	1	1	0	0	0	0	0	0	0
Our study	NGIEDV-104	SRR26202702	2021	BD-1.2	1	1	1	1	1	0	0	0	0	0	0	0
Our study	NGIEDV-105	SRR26202701	2021	BD-1.2	1	1	1	1	1	0	0	0	0	0	0	0
Our study	NGIEDV-106	SRR26202700	2021	BD-1.2	1	1	1	0	0	0	0	0	0	0	0	0
Our study	NGIEDV-108	SRR26202699	2021	BD-1.2	1	1	1	1	1	0	0	0	0	0	0	0
Our study	NGIEDV-109	SRR26202698	2021	BD-1.2	1	1	1	1	1	0	0	0	0	0	0	0
Our study	NGIEDV-110	SRR26202697	2021	BD-1.2	1	1	1	1	1	0	0	0	0	0	0	0
Our study	NGIEDV-111	SRR26202696	2021	BD-1.2	1	1	1	1	1	0	0	0	0	0	0	0
Our study	NGIEDV-112	SRR26202695	2021	BD-1.2	1	1	1	1	1	0	0	0	0	0	0	0
Our study	NGIEDV-113	SRR26202694	2021	BD-1.2	1	1	1	1	1	0	0	0	0	0	0	0
Our study	NGICDV-001	SRR26202727	2015	BD-2	0	0	0	0	0	1	1	1	1	1	1	1
Our study	NGICDV-002	SRR26202726	2015	BD-2	0	0	0	0	0	1	1	1	1	1	1	1
Our study	NGICDV-003	SRR26202686	2015	BD-2	0	0	0	0	0	1	1	1	1	1	1	1
Our study	NGICDV-005	SRR26202675	2015	BD-2	0	0	0	0	0	1	1	1	1	1	1	1
Our study	NGICDV-011	SRR26202664	2015	BD-2	0	0	0	0	0	1	1	1	1	1	1	1
Our study	NGICDV-012	SRR26202653	2015	BD-2	0	0	0	0	0	1	1	1	1	1	1	1
Our study	NGICDV-013	SRR26202642	2015	BD-2	0	0	0	0	0	1	1	1	1	1	1	1
Our study	NGICDV-014	SRR26202631	2015	BD-2	0	0	0	0	0	1	1	1	1	1	1	1
Our study	NGICDV-015	SRR26202620	2015	BD-2	0	0	0	0	0	1	1	1	1	1	1	1
Our study	NGICDV-017	SRR26202609	2015	BD-2	0	0	0	0	0	1	1	1	1	1	1	1
Our study	NGICDV-018	SRR26202725	2015	BD-2	0	0	0	0	0	1	1	1	1	1	1	1
Our study	NGICDV-019	SRR26202714	2015	BD-2	0	0	0	0	0	1	1	1	1	1	1	1
Our study	NGICDV-020	SRR26202703	2015	BD-2	0	0	0	0	0	1	1	1	1	1	1	1
Our study	NGICDV-025	SRR26202693	2016	BD-2	0	0	0	0	0	1	1	1	1	1	1	1
Our study	NGICDV-026	SRR26202692	2016	BD-2	0	0	0	0	0	1	1	1	1	1	1	1
Our study	NGICDV-027	SRR26202691	2016	BD-2	0	0	0	0	0	1	1	1	1	1	1	1
Our study	NGICDV-029	SRR26202690	2016	BD-2	0	0	0	0	0	1	1	1	1	1	1	1
Our study	NGICDV-030	SRR26202689	2016	BD-2	0	0	0	0	0	1	1	0	1	1	1	1
Our study	NGICDV-031	SRR26202688	2016	BD-2	0	0	0	0	0	1	1	1	1	1	1	1
Our study	NGICDV-032	SRR26202687	2016	BD-2	0	0	0	0	0	1	1	1	1	1	1	1
Our study	NGICDV-034	SRR26202684	2016	BD-2	0	0	0	0	0	1	1	1	1	1	1	1
Our study	NGICDV-035	SRR26202683	2016	BD-2	0	0	0	0	0	1	1	1	1	1	1	1
Our study	NGICDV-036	SRR26202682	2016	BD-2	0	0	0	0	0	1	1	1	1	1	1	1
Our study	NGICDV-037	SRR26202681	2016	BD-2	0	0	0	0	0	1	1	1	1	1	1	1
Our study	NGICDV-038	SRR26202680	2016	BD-2	0	0	0	0	0	1	1	1	1	1	1	1
Our study	NGICDV-039	SRR26202679	2016	BD-2	0	0	0	0	0	1	1	1	1	1	1	1
Our study	NGICDV-040	SRR26202678	2016	BD-2	0	0	0	0	0	1	1	1	1	1	1	1
Our study	NGICDV-041	SRR26202677	2017	BD-2	0	0	0	0	0	1	1	1	1	1	1	1
Our study	NGICDV-042	SRR26202676	2017	BD-2	0	0	0	0	0	1	1	1	1	1	1	1
Our study	NGICDV-043	SRR26202674	2017	BD-2	0	0	0	0	0	1	1	1	1	1	1	1
Our study	NGICDV-044	SRR26202673	2017	BD-2	0	0	0	0	0	1	1	1	1	1	1	1
Our study	NGICDV-047	SRR26202672	2017	BD-2	0	0	0	0	0	1	1	1	1	1	1	1
Our study	NGICDV-048	SRR26202671	2017	BD-2	0	0	0	0	0	1	1	1	1	1	1	1
Our study	NGICDV-049	SRR26202670	2017	BD-2	0	0	0	0	0	1	1	1	1	1	1	1
Our study	NGICDV-051	SRR26202668	2017	BD-2	0	0	0	0	0	1	1	1	1	1	1	1
Our study	NGICDV-052	SRR26202667	2017	BD-2	0	0	0	0	0	1	1	1	1	1	1	1
Our study	NGICDV-053	SRR26202666	2017	BD-2	0	0	0	0	0	1	1	1	1	1	1	1
Our study	NGICDV-054	SRR26202665	2017	BD-2	0	0	0	0	0	1	1	1	1	1	1	1
Our study	NGICDV-055	SRR26202663	2017	BD-2	0	0	0	0	0	1	1	1	1	1	1	1
Our study	NGICDV-056	SRR26202662	2017	BD-2	0	0	0	0	0	1	1	1	1	1	1	1
Our study	NGICDV-058	SRR26202661	2017	BD-2	0	0	0	0	0	1	1	1	1	1	1	1
Our study	NGICDV-066	SRR26202656	2018	BD-2	0	0	0	0	0	1	1	1	0	0	0	0
Our study	NGICDV-067	SRR26202655	2018	BD-2	0	0	0	0	0	1	1	1	1	1	1	1
Our study	NGICDV-081	SRR26202643	2019	BD-2	0	0	0	0	0	1	1	1	1	1	1	1
Our study	NGICDV-084	SRR26202640	2019	BD-2	0	0	0	0	0	1	1	1	1	1	1	1
Public	MAB035	DRR335720	2012	BD-0	1	1	0	1	1	1	1	0	0	0	0	0
Public	MAB037	DRR335721	2012	BD-0	1	1	0	1	1	1	1	0	0	0	0	0
Public	MAB039	DRR335723	2012	BD-0	1	1	0	1	1	1	1	0	0	0	0	0
Public	BGD004	DRR335607	2007	BD-1	1	1	1	1	1	0	1	1	0	0	0	0
Public	BGD006	DRR335609	2007	BD-1	1	1	1	1	1	0	1	1	0	0	0	0
Public	BGD009	DRR335612	2007	BD-1	1	1	1	0	0	0	1	1	0	0	0	0
Public	BGD010	DRR335613	2007	BD-1	1	1	1	1	1	0	1	1	0	0	0	0
Public	BGD012	DRR335615	2007	BD-1	1	1	1	1	1	0	1	1	0	0	0	0
Public	BGD013	DRR335616	2007	BD-1	1	1	1	1	1	0	1	1	0	0	0	0
Public	BGD014	DRR335617	2007	BD-1	1	1	1	0	0	0	1	1	0	0	0	0
Public	MAB001	DRR335691	2004	BD-1	1	1	1	1	1	0	1	1	0	0	0	0
Public	MAB005	DRR335695	2005	BD-1	1	1	1	1	1	0	1	1	0	0	0	0
Public	MAB007	DRR335697	2005	BD-1	1	1	1	1	1	0	1	1	0	0	0	0
Public	MAB011	DRR335700	2007	BD-1	1	1	1	1	1	0	1	1	0	0	0	0
Public	MAB012	DRR335701	2007	BD-1	1	1	1	1	1	1	2	1	0	0	0	0
Public	MAB013	DRR335702	2007	BD-1	1	1	1	1	1	0	1	1	0	0	0	0
Public	BGD107	DRR189278	2009	BD-1.1	1	1	1	1	1	0	1	1	0	0	0	0
Public	BGD110	DRR189280	2010	BD-1.1	1	1	1	1	1	0	1	1	0	0	0	0
Public	BGD111	DRR189281	2010	BD-1.1	1	1	1	1	1	0	1	1	0	0	0	0
Public	BGD113	DRR189282	2010	BD-1.1	1	1	1	1	1	0	1	1	0	0	0	0
Public	BGD114	DRR189283	2011	BD-1.1	1	1	1	1	1	0	1	1	0	0	0	0
Public	BGD116	DRR189284	2011	BD-1.1	1	1	1	1	1	0	1	1	0	0	0	0
Public	BGD126	DRR189292	2015	BD-1.1	1	1	1	1	1	0	1	1	0	0	0	0
Public	BGD060	DRR189308	2012	BD-1.1	1	1	1	1	1	0	1	1	0	0	0	0
Public	BGD065	DRR189309	2012	BD-1.1	1	1	1	1	1	0	1	1	0	0	0	0
Public	BGD050	DRR189310	2011	BD-1.1	1	1	1	1	1	0	1	1	0	0	0	0
Public	BGD056	DRR189311	2011	BD-1.1	1	1	1	1	1	0	1	1	0	0	0	0
Public	BGD067	DRR189312	2012	BD-1.1	1	1	1	1	1	0	1	1	0	0	0	0
Public	BGD057	DRR189313	2011	BD-1.1	1	1	1	1	1	0	1	1	0	0	0	0
Public	BGD058	DRR189314	2011	BD-1.1	1	1	1	1	1	0	1	1	0	0	0	0
Public	BGD043	DRR189347	2010	BD-1.1	1	1	1	1	1	0	1	1	0	0	0	0
Public	BGD007	DRR335610	2007	BD-1.1	1	1	1	1	1	0	1	1	0	0	0	0
Public	BGD008	DRR335611	2007	BD-1.1	1	1	1	1	1	0	1	1	0	0	0	0
Public	BGD011	DRR335614	2007	BD-1.1	1	1	1	1	1	0	1	1	0	0	0	0
Public	BGD015	DRR335618	2007	BD-1.1	1	1	1	1	1	0	1	1	0	0	0	0
Public	BGD016	DRR335619	2008	BD-1.1	1	1	1	1	1	0	1	1	0	0	0	0
Public	BGD018	DRR335620	2008	BD-1.1	1	1	1	1	1	0	1	1	0	0	0	0
Public	BGD019	DRR335621	2008	BD-1.1	1	1	1	1	1	0	1	1	0	0	0	0
Public	BGD020	DRR335622	2008	BD-1.1	1	1	1	1	1	0	1	1	0	0	0	0
Public	BGD021	DRR335623	2008	BD-1.1	1	1	1	1	1	0	1	1	0	0	0	0
Public	BGD022	DRR335624	2008	BD-1.1	1	1	1	1	1	0	1	1	0	0	0	0
Public	BGD023	DRR335625	2008	BD-1.1	1	1	1	1	1	0	1	1	0	0	0	0
Public	BGD024	DRR335626	2008	BD-1.1	1	1	1	1	1	0	1	1	0	0	0	0
Public	BGD025	DRR335627	2008	BD-1.1	1	1	1	1	1	0	1	1	0	0	0	0
Public	BGD037	DRR335635	2010	BD-1.1	1	1	1	1	1	0	1	1	0	0	0	0
Public	BGD038	DRR335636	2010	BD-1.1	1	1	1	1	1	0	1	1	0	0	0	0
Public	BGD039	DRR335637	2010	BD-1.1	1	1	1	1	1	0	1	1	0	0	0	0
Public	BGD040	DRR335638	2010	BD-1.1	1	1	1	1	1	0	1	1	0	0	0	0
Public	BGD041	DRR335639	2010	BD-1.1	1	1	1	1	1	0	1	1	0	0	0	0
Public	BGD042	DRR335640	2010	BD-1.1	1	1	1	1	1	0	1	1	0	0	0	0
Public	BGD044	DRR335641	2010	BD-1.1	1	1	1	1	1	0	1	1	0	0	0	0
Public	BGD045	DRR335642	2010	BD-1.1	1	1	1	1	1	0	1	1	0	0	0	0
Public	BGD047	DRR335644	2010	BD-1.1	1	1	1	1	1	0	1	1	0	0	0	0
Public	BGD048	DRR335645	2010	BD-1.1	1	1	1	1	1	0	1	1	0	0	0	0
Public	BGD049	DRR335646	2010	BD-1.1	1	1	1	1	1	0	1	1	0	0	0	0
Public	BGD051	DRR335647	2011	BD-1.1	1	1	1	1	1	0	1	1	0	0	0	0
Public	BGD052	DRR335648	2011	BD-1.1	1	1	1	1	1	0	1	1	0	0	0	0
Public	BGD053	DRR335649	2011	BD-1.1	1	1	1	1	1	0	1	1	0	0	0	0
Public	BGD061	DRR335650	2012	BD-1.1	1	1	1	1	1	0	1	1	0	0	0	0
Public	BGD064	DRR335651	2012	BD-1.1	1	1	1	1	1	0	1	1	0	0	0	0
Public	BGD066	DRR335652	2012	BD-1.1	1	1	1	1	1	0	1	1	0	0	0	0
Public	BGD068	DRR335653	2012	BD-1.1	1	1	1	1	1	0	1	1	0	0	0	0
Public	BGD112	DRR335669	2010	BD-1.1	1	1	1	1	1	0	1	1	0	0	0	0
Public	BGD115	DRR335670	2011	BD-1.1	1	1	1	1	1	0	1	1	0	0	0	0
Public	BGD125	DRR335672	2014	BD-1.1	1	1	1	1	1	0	1	1	0	0	0	0
Public	MAB002	DRR335692	2004	BD-1.1	1	1	1	1	1	0	1	1	0	0	0	0
Public	MAB018	DRR335706	2010	BD-1.1	1	1	1	1	1	0	1	1	0	0	0	0
Public	MAB019	DRR335707	2010	BD-1.1	1	1	1	1	1	0	1	1	0	0	0	0
Public	MAB021	DRR335708	2010	BD-1.1	1	1	1	1	1	0	1	1	0	0	0	0
Public	DMAVC-1	DRR395015	2022	BD-1.2	1	1	1	1	1	0	1	1	0	0	0	0
Public	DMAVC-2	DRR395007	2022	BD-1.2	1	1	1	1	1	0	1	1	0	0	0	0
Public	DMAVC-3	DRR395001	2022	BD-1.2	1	1	1	1	1	0	1	1	0	0	0	0
Public	DMAVC-4	DRR394994	2022	BD-1.2	1	1	1	1	1	0	1	1	0	0	0	0
Public	DMAVC-5	DRR395006	2022	BD-1.2	1	1	1	1	1	0	1	1	0	0	0	0
Public	DMAVC-6	DRR395002	2022	BD-1.2	1	1	1	1	1	0	1	1	0	0	0	0
Public	DMAVC-7	DRR395010	2022	BD-1.2	1	1	1	1	1	0	1	1	0	0	0	0
Public	DMAVC-8	DRR395008	2022	BD-1.2	1	1	1	1	1	0	1	1	0	0	0	0
Public	DMAVC-9	DRR395014	2022	BD-1.2	1	1	1	1	1	0	1	1	0	0	0	0
Public	DMAVC-10	DRR395005	2022	BD-1.2	1	1	1	1	1	0	1	1	0	0	0	0
Public	DMAVC-11	DRR394997	2022	BD-1.2	1	1	1	1	1	0	1	1	0	0	0	0
Public	DMAVC-12	DRR395012	2022	BD-1.2	1	1	1	1	1	0	1	1	0	0	0	0
Public	DMAVC-13	DRR395009	2022	BD-1.2	1	1	1	1	1	0	1	1	0	0	0	0
Public	DMAVC-14	DRR394998	2022	BD-1.2	1	1	1	1	1	0	1	1	0	0	0	0
Public	DMAVC-15	DRR395000	2022	BD-1.2	1	1	1	1	1	0	1	1	0	0	0	0
Public	DMAVC-16	DRR395004	2022	BD-1.2	1	1	1	1	1	0	1	1	0	0	0	0
Public	DMAVC-17	DRR395013	2022	BD-1.2	1	1	1	1	1	0	1	1	0	0	0	0
Public	DMAVC-18	DRR395011	2022	BD-1.2	1	1	1	1	1	0	1	1	0	0	0	0
Public	DMAVC-19	DRR395012	2022	BD-1.2	1	1	1	1	1	0	1	1	0	0	0	0
Public	DMAVC-20	DRR394996	2022	BD-1.2	1	1	1	1	1	0	1	1	0	0	0	0
Public	DMAVC-21	DRR395014	2022	BD-1.2	1	1	1	1	1	0	1	1	0	0	0	0
Public	DMAVC-22	DRR395015	2022	BD-1.2	1	1	1	1	1	0	1	2	0	0	0	0
Public	KMCP146	SRR14297458	2019	BD-1.2	1	1	1	1	1	0	1	1	0	0	0	0
Public	KDCP79	SRR14297543	2018	BD-1.2	1	1	1	1	1	0	1	1	0	0	0	0
Public	KDCP168	SRR14297545	2018	BD-1.2	1	1	1	1	1	0	1	1	0	0	0	0
Public	KDCP187	SRR14297547	2019	BD-1.2	1	1	1	1	1	0	1	1	0	0	0	0
Public	KDCP215	SRR14297548	2019	BD-1.2	1	1	1	1	1	0	1	1	0	0	0	0
Public	KDCP220	SRR14297549	2019	BD-1.2	1	1	1	1	1	0	1	1	0	0	0	0
Public	KDCP226	SRR14297550	2019	BD-1.2	1	1	1	1	1	0	1	1	0	0	0	0
Public	KDCP231	SRR14297551	2019	BD-1.2	1	1	1	1	1	0	1	1	0	0	0	0
Public	KDCP241	SRR14297552	2019	BD-1.2	1	1	1	1	1	0	1	1	0	0	0	0
Public	KDCP245	SRR14297553	2019	BD-1.2	1	1	1	1	1	0	1	1	0	0	0	0
Public	KDCP262	SRR14297554	2019	BD-1.2	1	1	1	1	1	0	1	1	0	0	0	0
Public	KDCP264	SRR14297556	2019	BD-1.2	1	1	1	1	1	0	1	1	0	0	0	0
Public	KDCP278	SRR14297557	2019	BD-1.2	1	1	1	1	1	0	1	1	0	0	0	0
Public	KDCP281	SRR14297558	2019	BD-1.2	1	1	1	1	1	0	1	1	0	0	0	0
Public	KMCP57	SRR14297560	2018	BD-1.2	1	1	1	1	1	0	1	1	0	0	0	0
Public	KMCP61	SRR14297561	2018	BD-1.2	1	1	1	1	1	0	1	1	0	0	0	0
Public	KMCP65	SRR14297562	2018	BD-1.2	1	1	1	1	1	0	1	1	0	0	0	0
Public	KMCP68	SRR14297563	2018	BD-1.2	1	1	1	1	1	0	1	1	0	0	0	0
Public	KMCP69	SRR14297564	2018	BD-1.2	1	1	1	1	1	0	1	1	0	0	0	0
Public	KMCP70	SRR14297565	2018	BD-1.2	1	1	1	1	1	0	1	1	0	0	0	0
Public	KMCP88	SRR14297566	2018	BD-1.2	1	1	1	1	1	0	1	1	0	0	0	0
Public	KMCP93	SRR14297568	2018	BD-1.2	1	1	1	1	1	0	1	1	0	0	0	0
Public	KMCP119	SRR14297569	2019	BD-1.2	1	1	1	1	1	0	1	1	0	0	0	0
Public	KMCP134	SRR14297570	2019	BD-1.2	1	1	1	1	1	0	1	1	0	0	0	0
Public	KMCP137	SRR14297571	2019	BD-1.2	1	1	1	1	1	0	1	1	0	0	0	0
Public	KDCP82	SRR14297663	2018	BD-1.2	1	1	1	1	1	0	1	1	0	0	0	0
Public	KDCP83	SRR14297665	2018	BD-1.2	1	1	1	1	1	0	1	1	0	0	0	0
Public	KDCP87	SRR14297666	2018	BD-1.2	1	1	1	1	1	0	1	1	0	0	0	0
Public	KDCP98	SRR14297668	2018	BD-1.2	1	1	1	1	1	0	1	1	0	0	0	0
Public	KDCP103	SRR14297669	2018	BD-1.2	1	1	1	1	1	0	1	1	0	0	0	0
Public	KDCP136	SRR14297670	2018	BD-1.2	1	1	1	1	1	0	1	1	0	0	0	0
Public	KDCP137	SRR14297671	2018	BD-1.2	1	1	1	1	1	0	1	1	0	0	0	0
Public	KDCP140	SRR14297673	2018	BD-1.2	1	1	1	1	1	0	1	1	0	0	0	0
Public	KDCP144	SRR14297674	2018	BD-1.2	1	1	1	1	1	0	1	1	0	0	0	0
Public	KDCP147	SRR14297676	2018	BD-1.2	1	1	1	1	1	0	1	1	0	0	0	0
Public	KDCP148	SRR14297677	2018	BD-1.2	1	1	1	1	1	0	1	1	0	0	0	0
Public	KDCP152	SRR14297678	2018	BD-1.2	1	1	1	1	1	0	1	1	0	0	0	0
Public	KDCP154	SRR14297679	2018	BD-1.2	1	1	1	1	1	0	1	1	0	0	0	0
Public	KDCP195	SRR14297680	2019	BD-1.2	1	1	1	1	1	0	1	1	0	0	0	0
Public	KDCP202	SRR14297681	2019	BD-1.2	1	1	1	1	1	0	1	1	0	0	0	0
Public	KDCP208	SRR14297682	2019	BD-1.2	1	1	1	1	1	0	1	1	0	0	0	0
Public	KDCP228	SRR14297684	2019	BD-1.2	1	1	1	1	1	0	1	1	0	0	0	0
Public	KDCP250	SRR14297685	2019	BD-1.2	1	1	1	1	1	0	1	1	0	0	0	0
Public	KDCP254	SRR14297686	2019	BD-1.2	1	1	1	1	1	0	1	1	0	0	0	0
Public	KDCP260	SRR14297687	2019	BD-1.2	1	1	1	1	1	0	1	1	0	0	0	0
Public	KDCP270	SRR14297689	2019	BD-1.2	1	1	1	1	1	0	1	1	0	0	0	0
Public	KMCP52	SRR14297690	2018	BD-1.2	1	1	1	1	1	0	1	1	0	0	0	0
Public	KMCP55	SRR14297691	2018	BD-1.2	1	1	1	1	1	0	1	1	0	0	0	0
Public	KMCP56	SRR14297692	2018	BD-1.2	1	1	1	1	1	0	1	1	0	0	0	0
Public	KMCP67	SRR14297694	2018	BD-1.2	1	1	1	1	1	0	1	1	0	0	0	0
Public	KMCP72	SRR14297695	2018	BD-1.2	1	1	1	1	1	0	1	1	0	0	0	0
Public	KMCP85	SRR14297697	2018	BD-1.2	1	1	1	1	1	0	1	1	0	0	0	0
Public	KMCP107	SRR14297699	2019	BD-1.2	1	1	1	1	1	0	1	1	0	0	0	0
Public	KMCP138	SRR14297700	2019	BD-1.2	1	1	1	1	1	0	1	1	0	0	0	0
Public	KMCP145	SRR14297701	2019	BD-1.2	1	1	1	1	1	0	1	1	0	0	0	0
Public	BGD005	DRR335608	2007	BD-2	0	0	0	0	0	1	1	1	1	1	1	1
Public	BGD029	DRR335628	2009	BD-2	0	0	0	0	0	1	1	1	1	1	1	1
Public	BGD030	DRR335629	2009	BD-2	0	0	0	0	0	1	1	1	1	1	1	1
Public	BGD031	DRR335630	2009	BD-2	0	0	0	0	0	1	1	1	1	1	0	0
Public	BGD032	DRR335631	2009	BD-2	0	0	0	0	0	1	1	1	1	1	1	1
Public	BGD033	DRR335632	2009	BD-2	0	0	0	0	0	1	1	1	1	1	1	1
Public	BGD034	DRR335633	2009	BD-2	0	0	0	0	0	1	1	1	1	1	0	0
Public	BGD035	DRR335634	2009	BD-2	0	0	0	0	0	1	1	1	1	1	1	1
Public	BGD046	DRR335643	2010	BD-2	0	0	0	0	0	1	1	1	1	1	1	1
Public	BGD071	DRR335654	2013	BD-2	0	0	0	0	0	1	1	1	1	1	1	1
Public	BGD073	DRR335655	2013	BD-2	0	0	0	0	0	1	1	1	1	1	1	1
Public	BGD074	DRR335656	2013	BD-2	0	0	0	0	0	1	1	1	1	1	1	1
Public	BGD075	DRR335657	2013	BD-2	0	0	0	0	0	1	1	1	1	1	1	1
Public	BGD078	DRR335658	2013	BD-2	0	0	0	0	0	1	1	1	1	1	1	1
Public	BGD080	DRR335659	2013	BD-2	0	0	0	0	0	1	1	1	1	1	1	1
Public	BGD081	DRR335660	2013	BD-2	0	0	0	0	0	1	1	1	1	1	1	1
Public	BGD083	DRR335661	2013	BD-2	0	0	0	0	0	1	1	1	1	1	1	1
Public	BGD085	DRR335662	2014	BD-2	0	0	0	0	0	1	1	1	1	1	1	1
Public	BGD090	DRR335663	2014	BD-2	0	0	0	0	0	1	1	1	1	1	1	1
Public	BGD093	DRR335664	2014	BD-2	0	0	0	0	0	1	1	1	1	1	1	1
Public	BGD097	DRR335665	2014	BD-2	0	0	0	0	0	1	1	1	1	1	1	1
Public	BGD099	DRR335666	2014	BD-2	0	0	0	0	0	1	1	1	1	1	1	1
Public	BGD106	DRR335667	2009	BD-2	0	0	0	0	0	1	1	1	1	1	1	1
Public	BGD108	DRR335668	2009	BD-2	0	0	0	0	0	1	1	1	1	1	1	1
Public	BGD123	DRR335671	2013	BD-2	0	0	0	0	0	1	1	1	1	1	1	1
Public	BGD127	DRR335673	2015	BD-2	0	0	0	0	0	1	1	1	0	0	0	0
Public	BGD131	DRR335674	2015	BD-2	0	0	0	0	0	1	1	1	1	1	1	1
Public	BGD134	DRR335675	2015	BD-2	0	0	0	0	0	1	1	1	1	1	1	1
Public	BGD135	DRR335676	2015	BD-2	0	0	0	0	0	1	1	1	1	1	1	1
Public	BGD144	DRR335677	2016	BD-2	0	0	0	0	0	1	1	1	1	1	1	1
Public	BGD145	DRR335678	2016	BD-2	0	0	0	0	0	1	1	1	1	1	1	1
Public	BGD147	DRR335679	2016	BD-2	0	0	0	0	0	1	1	1	1	1	1	1
Public	BGD150	DRR335680	2017	BD-2	0	0	0	0	0	1	1	1	0	0	0	0
Public	BGD151	DRR335681	2017	BD-2	0	0	0	0	0	1	1	1	0	0	0	0
Public	BGD152	DRR335682	2017	BD-2	0	0	0	0	0	1	1	1	1	1	1	1
Public	BGD153	DRR335683	2017	BD-2	0	0	0	0	0	1	1	1	1	1	1	1
Public	BGD154	DRR335684	2017	BD-2	0	0	0	0	0	1	1	1	1	1	1	1
Public	BGD155	DRR335685	2017	BD-2	0	0	0	0	0	1	1	1	1	1	1	1
Public	BGD156	DRR335686	2017	BD-2	0	0	0	0	0	1	1	1	1	1	1	1
Public	BGD157	DRR335687	2017	BD-2	0	0	0	0	0	1	1	1	1	1	1	1
Public	BGD158	DRR335688	2017	BD-2	0	0	0	0	0	1	1	1	1	1	1	1
Public	BGD159	DRR335689	2017	BD-2	0	0	0	0	0	1	1	1	1	1	1	1
Public	BGD160	DRR335690	2017	BD-2	0	0	0	0	0	1	1	1	0	0	0	0
Public	MAB003	DRR335693	2004	BD-2	0	0	0	0	0	1	1	1	1	1	1	1
Public	MAB010	DRR335613	2006	BD-2	0	0	0	0	0	1	1	1	1	1	1	1
Public	MAB014	DRR335703	2008	BD-2	0	0	0	0	0	1	1	1	1	1	1	1
Public	MAB015	DRR335704	2008	BD-2	0	0	0	0	0	1	1	1	1	1	1	1
Public	MAB017	DRR335705	2009	BD-2	0	0	0	0	0	1	1	1	1	1	1	1
Public	MAB022	DRR335709	2010	BD-2	0	0	0	0	0	1	1	1	1	1	1	1
Public	MAB023	DRR335710	2011	BD-2	0	0	0	0	0	1	1	1	1	1	1	1
Public	MAB025	DRR335711	2011	BD-2	0	0	0	0	0	1	1	1	1	1	1	1
Public	MAB026	DRR335712	2011	BD-2	0	0	0	0	0	1	1	1	1	1	1	1
Public	MAB027	DRR335713	2011	BD-2	0	0	0	0	0	0	0	1	1	1	1	1
Public	MAB028	DRR335714	2011	BD-2	0	0	0	0	0	1	1	1	1	1	1	1
Public	MAB029	DRR335715	2011	BD-2	0	0	0	0	0	1	1	1	1	1	1	1
Public	MAB030	DRR335716	2011	BD-2	0	0	0	0	0	1	1	1	1	1	0	0
Public	MAB032	DRR335717	2012	BD-2	0	0	0	0	0	1	1	1	1	1	1	1
Public	MAB033	DRR335718	2012	BD-2	0	0	0	0	0	1	1	1	1	1	1	1
Public	MAB034	DRR335719	2012	BD-2	0	0	0	0	0	1	1	1	1	1	1	1
Public	MAB038	DRR335722	2012	BD-2	0	0	0	0	0	1	1	1	1	1	1	1
Public	MAB040	DRR335724	2013	BD-2	0	0	0	0	0	1	1	1	1	1	1	1
Public	MAB041	DRR335725	2014	BD-2	0	0	0	0	0	1	1	1	1	1	1	1
Public	KDCP74	SRR14297542	2018	BD-2	0	0	0	0	0	1	1	1	0	0	0	0
Public	KDCP81	SRR14297544	2018	BD-2	0	0	0	0	0	1	1	1	0	0	0	0
Public	KDCP183	SRR14297546	2019	BD-2	0	0	0	0	0	1	1	1	1	1	1	1
Public	KMCP49	SRR14297559	2018	BD-2	0	0	0	0	0	1	1	1	1	1	1	1
Public	KDCP69	SRR14297662	2018	BD-2	0	0	0	0	0	1	1	1	1	1	1	1
Public	KDCP90	SRR14297667	2018	BD-2	0	0	0	0	0	1	1	1	0	0	0	0
Public	KMCP80	SRR14297696	2018	BD-2	0	0	0	0	0	1	1	1	1	1	1	1
Public	MAB004	DRR335694	2005	BD-2	1	0	0	0	0	1	1	1	1	1	1	1
Public	MAB006	DRR335696	2005	BD-2	1	0	0	0	0	1	1	1	1	1	1	1
Public	MAB008	DRR335698	2006	BD-2	1	0	0	0	0	1	1	1	1	1	0	0
