# Supplementary material for: Core and accessory genomic traits of Vibrio cholerae O1 drive lineage transmission and disease severity
Source: Nat Commun. 2024 Sep 23;15:8231. doi: 10.1038/s41467-024-52238-0 (PMC11420230; doi:10.1038/s41467-024-52238-0)
Supplement: Supplementary file 18 — Supplementary Data 15 [file 41467_2024_52238_MOESM18_ESM.xlsx]

## Sheet: ML performance indicators
Logistic Regression
Symptom	AUC	Accuracy	Sensitivity	Specificity	Precision	Cohens Kappa
Abdominal Pain	0.862 ± 0.023	0.793 ± 0.037	0.759 ± 0.061	0.826 ± 0.03	0.826 ± 0.033	0.585 ± 0.074
Dehyd_3_2	0.898 ± 0.022	0.815 ± 0.026	0.81 ± 0.046	0.82 ± 0.038	0.836 ± 0.031	0.63 ± 0.052
Diadur_1_2	0.94 ± 0.015	0.85 ± 0.023	0.874 ± 0.03	0.825 ± 0.037	0.847 ± 0.03	0.699 ± 0.046
Numstool_3_4	0.92 ± 0.025	0.819 ± 0.027	0.813 ± 0.034	0.827 ± 0.038	0.844 ± 0.031	0.637 ± 0.051
Numstool_3_5	0.941 ± 0.016	0.857 ± 0.024	0.855 ± 0.039	0.86 ± 0.032	0.878 ± 0.03	0.715 ± 0.047
Vomit	0.949 ± 0.012	0.878 ± 0.024	0.885 ± 0.039	0.872 ± 0.025	0.88 ± 0.025	0.756 ± 0.049
Linear SVM
Symptom	AUC	Accuracy	Sensitivity	Specificity	Precision	Cohens Kappa
Abdominal Pain	0.838 ± 0.041	0.764 ± 0.044	0.739 ± 0.062	0.79 ± 0.046	0.793 ± 0.046	0.529 ± 0.087
Dehyd_3_2	0.893 ± 0.021	0.793 ± 0.029	0.79 ± 0.054	0.797 ± 0.053	0.816 ± 0.042	0.586 ± 0.058
Diadur_1_2	0.902 ± 0.024	0.812 ± 0.03	0.837 ± 0.054	0.787 ± 0.05	0.815 ± 0.036	0.623 ± 0.061
Numstool_3_4	0.911 ± 0.028	0.791 ± 0.035	0.805 ± 0.059	0.773 ± 0.066	0.803 ± 0.045	0.577 ± 0.071
Numstool_3_5	0.936 ± 0.017	0.814 ± 0.031	0.837 ± 0.057	0.791 ± 0.054	0.826 ± 0.036	0.628 ± 0.061
Vomit	0.938 ± 0.014	0.853 ± 0.019	0.898 ± 0.031	0.81 ± 0.03	0.833 ± 0.023	0.707 ± 0.039
RBF SVM
Symptom	AUC	Accuracy	Sensitivity	Specificity	Precision	Cohens Kappa
Abdominal Pain	0.874 ± 0.021	0.808 ± 0.032	0.816 ± 0.058	0.8 ± 0.026	0.811 ± 0.03	0.616 ± 0.064
Dehyd_3_2	0.905 ± 0.016	0.805 ± 0.028	0.81 ± 0.043	0.803 ± 0.042	0.823 ± 0.034	0.611 ± 0.056
Diadur_1_2	0.926 ± 0.019	0.842 ± 0.02	0.859 ± 0.028	0.826 ± 0.036	0.845 ± 0.027	0.685 ± 0.04
Numstool_3_4	0.907 ± 0.028	0.82 ± 0.035	0.793 ± 0.048	0.847 ± 0.044	0.858 ± 0.039	0.638 ± 0.069
Numstool_3_5	0.935 ± 0.023	0.832 ± 0.026	0.811 ± 0.036	0.853 ± 0.036	0.866 ± 0.034	0.664 ± 0.052
Vomit	0.942 ± 0.013	0.866 ± 0.024	0.921 ± 0.05	0.813 ± 0.026	0.839 ± 0.018	0.733 ± 0.048
Random Forest
Symptom	AUC	Accuracy	Sensitivity	Specificity	Precision	Cohens Kappa
Abdominal Pain	0.867 ± 0.018	0.805 ± 0.028	0.788 ± 0.047	0.822 ± 0.026	0.828 ± 0.024	0.61 ± 0.056
Dehyd_3_2	0.876 ± 0.024	0.77 ± 0.034	0.711 ± 0.055	0.828 ± 0.035	0.823 ± 0.04	0.539 ± 0.068
Diadur_1_2	0.903 ± 0.022	0.856 ± 0.018	0.854 ± 0.035	0.858 ± 0.017	0.87 ± 0.018	0.712 ± 0.036
Numstool_3_4	0.895 ± 0.031	0.794 ± 0.057	0.73 ± 0.075	0.859 ± 0.057	0.846 ± 0.075	0.587 ± 0.113
Numstool_3_5	0.875 ± 0.034	0.815 ± 0.034	0.743 ± 0.061	0.888 ± 0.051	0.886 ± 0.054	0.631 ± 0.068
Vomit	0.944 ± 0.016	0.866 ± 0.022	0.852 ± 0.036	0.881 ± 0.028	0.886 ± 0.026	0.733 ± 0.043
Extra Tree
Symptom	AUC	Accuracy	Sensitivity	Specificity	Precision	Cohens Kappa
Abdominal Pain	0.879 ± 0.019	0.824 ± 0.022	0.83 ± 0.041	0.817 ± 0.023	0.831 ± 0.021	0.647 ± 0.044
Dehyd_3_2	0.884 ± 0.023	0.786 ± 0.033	0.74 ± 0.047	0.832 ± 0.038	0.832 ± 0.039	0.571 ± 0.067
Diadur_1_2	0.915 ± 0.016	0.867 ± 0.023	0.875 ± 0.041	0.86 ± 0.018	0.874 ± 0.019	0.735 ± 0.046
Numstool_3_4	0.896 ± 0.028	0.788 ± 0.035	0.721 ± 0.053	0.855 ± 0.048	0.856 ± 0.041	0.574 ± 0.069
Numstool_3_5	0.894 ± 0.029	0.817 ± 0.036	0.755 ± 0.068	0.88 ± 0.041	0.88 ± 0.048	0.635 ± 0.071
Vomit	0.944 ± 0.015	0.865 ± 0.027	0.847 ± 0.044	0.884 ± 0.027	0.886 ± 0.025	0.73 ± 0.054
Adaboost
Symptom	AUC	Accuracy	Sensitivity	Specificity	Precision	Cohens Kappa
Abdominal Pain	0.803 ± 0.035	0.757 ± 0.042	0.724 ± 0.081	0.79 ± 0.035	0.785 ± 0.03	0.515 ± 0.083
Dehyd_3_2	0.909 ± 0.027	0.825 ± 0.033	0.786 ± 0.048	0.864 ± 0.034	0.865 ± 0.032	0.65 ± 0.067
Diadur_1_2	0.897 ± 0.027	0.828 ± 0.031	0.822 ± 0.047	0.834 ± 0.038	0.844 ± 0.033	0.657 ± 0.062
Numstool_3_4	0.847 ± 0.051	0.76 ± 0.048	0.737 ± 0.08	0.785 ± 0.051	0.777 ± 0.073	0.52 ± 0.096
Numstool_3_5	0.895 ± 0.041	0.825 ± 0.041	0.852 ± 0.052	0.799 ± 0.063	0.839 ± 0.047	0.651 ± 0.082
Vomit	0.922 ± 0.024	0.847 ± 0.024	0.821 ± 0.041	0.872 ± 0.026	0.872 ± 0.024	0.693 ± 0.048
XGBoost
Symptom	AUC	Accuracy	Sensitivity	Specificity	Precision	Cohens Kappa
Abdominal Pain	0.835 ± 0.033	0.765 ± 0.035	0.733 ± 0.061	0.798 ± 0.037	0.795 ± 0.037	0.53 ± 0.069
Dehyd_3_2	0.896 ± 0.027	0.791 ± 0.032	0.747 ± 0.044	0.836 ± 0.042	0.835 ± 0.04	0.583 ± 0.064
Diadur_1_2	0.912 ± 0.026	0.842 ± 0.03	0.838 ± 0.061	0.845 ± 0.043	0.86 ± 0.033	0.683 ± 0.06
Numstool_3_4	0.816 ± 0.051	0.737 ± 0.046	0.704 ± 0.087	0.776 ± 0.07	0.77 ± 0.08	0.476 ± 0.094
Numstool_3_5	0.883 ± 0.037	0.805 ± 0.048	0.749 ± 0.079	0.86 ± 0.05	0.872 ± 0.048	0.609 ± 0.097
Vomit	0.926 ± 0.021	0.842 ± 0.027	0.818 ± 0.043	0.868 ± 0.032	0.87 ± 0.027	0.684 ± 0.054
