# Supplementary material for: Core and accessory genomic traits of Vibrio cholerae O1 drive lineage transmission and disease severity
Source: Nat Commun. 2024 Sep 23;15:8231. doi: 10.1038/s41467-024-52238-0 (PMC11420230; doi:10.1038/s41467-024-52238-0)
Supplement: Supplementary file 22 — Supplementary Data 19 [file 41467_2024_52238_MOESM22_ESM.xlsx]

## Sheet: Sheet1
Gene Name	Locus Tag	category	term ID	term description
add	VC_2751	BP	GO:0006139	Nucleobase-containing compound metabolic process
add	VC_2751	BP	GO:0006144	Purine nucleobase metabolic process
add	VC_2751	BP	GO:0006152	Purine nucleoside catabolic process
add	VC_2751	BP	GO:0006154	Adenosine catabolic process
add	VC_2751	BP	GO:0006725	Cellular aromatic compound metabolic process
add	VC_2751	BP	GO:0006753	Nucleoside phosphate metabolic process
add	VC_2751	BP	GO:0006793	Phosphorus metabolic process
add	VC_2751	BP	GO:0006796	Phosphate-containing compound metabolic process
add	VC_2751	BP	GO:0006807	Nitrogen compound metabolic process
add	VC_2751	BP	GO:0008152	Metabolic process
add	VC_2751	BP	GO:0009056	Catabolic process
add	VC_2751	BP	GO:0009058	Biosynthetic process
add	VC_2751	BP	GO:0009112	Nucleobase metabolic process
add	VC_2751	BP	GO:0009113	Purine nucleobase biosynthetic process
add	VC_2751	BP	GO:0009116	Nucleoside metabolic process
add	VC_2751	BP	GO:0009117	Nucleotide metabolic process
add	VC_2751	BP	GO:0009119	Ribonucleoside metabolic process
add	VC_2751	BP	GO:0009123	Nucleoside monophosphate metabolic process
add	VC_2751	BP	GO:0009124	Nucleoside monophosphate biosynthetic process
add	VC_2751	BP	GO:0009126	Purine nucleoside monophosphate metabolic process
add	VC_2751	BP	GO:0009127	Purine nucleoside monophosphate biosynthetic process
add	VC_2751	BP	GO:0009156	Ribonucleoside monophosphate biosynthetic process
add	VC_2751	BP	GO:0009161	Ribonucleoside monophosphate metabolic process
add	VC_2751	BP	GO:0009163	Nucleoside biosynthetic process
add	VC_2751	BP	GO:0009164	Nucleoside catabolic process
add	VC_2751	BP	GO:0009167	Purine ribonucleoside monophosphate metabolic process
add	VC_2751	BP	GO:0009168	Purine ribonucleoside monophosphate biosynthetic process
add	VC_2751	BP	GO:0009987	Cellular process
add	VC_2751	BP	GO:0018130	Heterocycle biosynthetic process
add	VC_2751	BP	GO:0019438	Aromatic compound biosynthetic process
add	VC_2751	BP	GO:0019439	Aromatic compound catabolic process
add	VC_2751	BP	GO:0019637	Organophosphate metabolic process
add	VC_2751	BP	GO:0034404	Nucleobase-containing small molecule biosynthetic process
add	VC_2751	BP	GO:0034641	Cellular nitrogen compound metabolic process
add	VC_2751	BP	GO:0034654	Nucleobase-containing compound biosynthetic process
add	VC_2751	BP	GO:0034655	Nucleobase-containing compound catabolic process
add	VC_2751	BP	GO:0034656	Nucleobase-containing small molecule catabolic process
add	VC_2751	BP	GO:0042278	Purine nucleoside metabolic process
add	VC_2751	BP	GO:0042451	Purine nucleoside biosynthetic process
add	VC_2751	BP	GO:0042454	Ribonucleoside catabolic process
add	VC_2751	BP	GO:0042455	Ribonucleoside biosynthetic process
add	VC_2751	BP	GO:0043094	Cellular metabolic compound salvage
add	VC_2751	BP	GO:0043096	Purine nucleobase salvage
add	VC_2751	BP	GO:0043101	Purine-containing compound salvage
add	VC_2751	BP	GO:0043103	Hypoxanthine salvage
add	VC_2751	BP	GO:0044237	Cellular metabolic process
add	VC_2751	BP	GO:0044238	Primary metabolic process
add	VC_2751	BP	GO:0044248	Cellular catabolic process
add	VC_2751	BP	GO:0044249	Cellular biosynthetic process
add	VC_2751	BP	GO:0044270	Cellular nitrogen compound catabolic process
add	VC_2751	BP	GO:0044271	Cellular nitrogen compound biosynthetic process
add	VC_2751	BP	GO:0044281	Small molecule metabolic process
add	VC_2751	BP	GO:0044282	Small molecule catabolic process
add	VC_2751	BP	GO:0044283	Small molecule biosynthetic process
add	VC_2751	BP	GO:0046085	Adenosine metabolic process
add	VC_2751	BP	GO:0046100	Hypoxanthine metabolic process
add	VC_2751	BP	GO:0046101	Hypoxanthine biosynthetic process
add	VC_2751	BP	GO:0046102	Inosine metabolic process
add	VC_2751	BP	GO:0046103	Inosine biosynthetic process
add	VC_2751	BP	GO:0046112	Nucleobase biosynthetic process
add	VC_2751	BP	GO:0046128	Purine ribonucleoside metabolic process
add	VC_2751	BP	GO:0046129	Purine ribonucleoside biosynthetic process
add	VC_2751	BP	GO:0046130	Purine ribonucleoside catabolic process
add	VC_2751	BP	GO:0046483	Heterocycle metabolic process
add	VC_2751	BP	GO:0046700	Heterocycle catabolic process
add	VC_2751	BP	GO:0055086	Nucleobase-containing small molecule metabolic process
add	VC_2751	BP	GO:0071704	Organic substance metabolic process
add	VC_2751	BP	GO:0072521	Purine-containing compound metabolic process
add	VC_2751	BP	GO:0072522	Purine-containing compound biosynthetic process
add	VC_2751	BP	GO:0072523	Purine-containing compound catabolic process
add	VC_2751	BP	GO:0090407	Organophosphate biosynthetic process
add	VC_2751	BP	GO:1901135	Carbohydrate derivative metabolic process
add	VC_2751	BP	GO:1901136	Carbohydrate derivative catabolic process
add	VC_2751	BP	GO:1901137	Carbohydrate derivative biosynthetic process
add	VC_2751	BP	GO:1901293	Nucleoside phosphate biosynthetic process
add	VC_2751	BP	GO:1901360	Organic cyclic compound metabolic process
add	VC_2751	BP	GO:1901361	Organic cyclic compound catabolic process
add	VC_2751	BP	GO:1901362	Organic cyclic compound biosynthetic process
add	VC_2751	BP	GO:1901564	Organonitrogen compound metabolic process
add	VC_2751	BP	GO:1901565	Organonitrogen compound catabolic process
add	VC_2751	BP	GO:1901566	Organonitrogen compound biosynthetic process
add	VC_2751	BP	GO:1901575	Organic substance catabolic process
add	VC_2751	BP	GO:1901576	Organic substance biosynthetic process
add	VC_2751	BP	GO:1901657	Glycosyl compound metabolic process
add	VC_2751	BP	GO:1901658	Glycosyl compound catabolic process
add	VC_2751	BP	GO:1901659	Glycosyl compound biosynthetic process
blc	VC_A0317	BP	GO:0000302	Response to reactive oxygen species
blc	VC_A0317	BP	GO:0006629	Lipid metabolic process
blc	VC_A0317	BP	GO:0006950	Response to stress
blc	VC_A0317	BP	GO:0006979	Response to oxidative stress
blc	VC_A0317	BP	GO:0008152	Metabolic process
blc	VC_A0317	BP	GO:0042221	Response to chemical
blc	VC_A0317	BP	GO:0044238	Primary metabolic process
blc	VC_A0317	BP	GO:0050896	Response to stimulus
blc	VC_A0317	BP	GO:0071704	Organic substance metabolic process
blc	VC_A0317	BP	GO:1901700	Response to oxygen-containing compound
clpS	VC_1143	BP	GO:0006508	Proteolysis
clpS	VC_1143	BP	GO:0006807	Nitrogen compound metabolic process
clpS	VC_1143	BP	GO:0008152	Metabolic process
clpS	VC_1143	BP	GO:0009056	Catabolic process
clpS	VC_1143	BP	GO:0009057	Macromolecule catabolic process
clpS	VC_1143	BP	GO:0019538	Protein metabolic process
clpS	VC_1143	BP	GO:0030163	Protein catabolic process
clpS	VC_1143	BP	GO:0043170	Macromolecule metabolic process
clpS	VC_1143	BP	GO:0044238	Primary metabolic process
clpS	VC_1143	BP	GO:0071704	Organic substance metabolic process
clpS	VC_1143	BP	GO:1901564	Organonitrogen compound metabolic process
clpS	VC_1143	BP	GO:1901565	Organonitrogen compound catabolic process
clpS	VC_1143	BP	GO:1901575	Organic substance catabolic process
dapF	VC_0126	BP	GO:0006082	Organic acid metabolic process
dapF	VC_0126	BP	GO:0006520	Cellular amino acid metabolic process
dapF	VC_0126	BP	GO:0006553	Lysine metabolic process
dapF	VC_0126	BP	GO:0006807	Nitrogen compound metabolic process
dapF	VC_0126	BP	GO:0008152	Metabolic process
dapF	VC_0126	BP	GO:0008652	Cellular amino acid biosynthetic process
dapF	VC_0126	BP	GO:0009058	Biosynthetic process
dapF	VC_0126	BP	GO:0009066	Aspartate family amino acid metabolic process
dapF	VC_0126	BP	GO:0009067	Aspartate family amino acid biosynthetic process
dapF	VC_0126	BP	GO:0009085	Lysine biosynthetic process
dapF	VC_0126	BP	GO:0009089	Lysine biosynthetic process via diaminopimelate
dapF	VC_0126	BP	GO:0009987	Cellular process
dapF	VC_0126	BP	GO:0016053	Organic acid biosynthetic process
dapF	VC_0126	BP	GO:0019752	Carboxylic acid metabolic process
dapF	VC_0126	BP	GO:0043436	Oxoacid metabolic process
dapF	VC_0126	BP	GO:0043648	Dicarboxylic acid metabolic process
dapF	VC_0126	BP	GO:0044237	Cellular metabolic process
dapF	VC_0126	BP	GO:0044238	Primary metabolic process
dapF	VC_0126	BP	GO:0044249	Cellular biosynthetic process
dapF	VC_0126	BP	GO:0044281	Small molecule metabolic process
dapF	VC_0126	BP	GO:0044283	Small molecule biosynthetic process
dapF	VC_0126	BP	GO:0046394	Carboxylic acid biosynthetic process
dapF	VC_0126	BP	GO:0046451	Diaminopimelate metabolic process
dapF	VC_0126	BP	GO:0071704	Organic substance metabolic process
dapF	VC_0126	BP	GO:1901564	Organonitrogen compound metabolic process
dapF	VC_0126	BP	GO:1901566	Organonitrogen compound biosynthetic process
dapF	VC_0126	BP	GO:1901576	Organic substance biosynthetic process
dapF	VC_0126	BP	GO:1901605	Alpha-amino acid metabolic process
dapF	VC_0126	BP	GO:1901607	Alpha-amino acid biosynthetic process
fabH1	VC_2023	BP	GO:0006082	Organic acid metabolic process
fabH1	VC_2023	BP	GO:0006629	Lipid metabolic process
fabH1	VC_2023	BP	GO:0006631	Fatty acid metabolic process
fabH1	VC_2023	BP	GO:0006633	Fatty acid biosynthetic process
fabH1	VC_2023	BP	GO:0008152	Metabolic process
fabH1	VC_2023	BP	GO:0008610	Lipid biosynthetic process
fabH1	VC_2023	BP	GO:0009058	Biosynthetic process
fabH1	VC_2023	BP	GO:0009987	Cellular process
fabH1	VC_2023	BP	GO:0016053	Organic acid biosynthetic process
fabH1	VC_2023	BP	GO:0019752	Carboxylic acid metabolic process
fabH1	VC_2023	BP	GO:0032787	Monocarboxylic acid metabolic process
fabH1	VC_2023	BP	GO:0043436	Oxoacid metabolic process
fabH1	VC_2023	BP	GO:0044237	Cellular metabolic process
fabH1	VC_2023	BP	GO:0044238	Primary metabolic process
fabH1	VC_2023	BP	GO:0044249	Cellular biosynthetic process
fabH1	VC_2023	BP	GO:0044255	Cellular lipid metabolic process
fabH1	VC_2023	BP	GO:0044281	Small molecule metabolic process
fabH1	VC_2023	BP	GO:0044283	Small molecule biosynthetic process
fabH1	VC_2023	BP	GO:0046394	Carboxylic acid biosynthetic process
fabH1	VC_2023	BP	GO:0071704	Organic substance metabolic process
fabH1	VC_2023	BP	GO:0072330	Monocarboxylic acid biosynthetic process
fabH1	VC_2023	BP	GO:1901576	Organic substance biosynthetic process
fabV	VC_1738	BP	GO:0006082	Organic acid metabolic process
fabV	VC_1738	BP	GO:0006629	Lipid metabolic process
fabV	VC_1738	BP	GO:0006631	Fatty acid metabolic process
fabV	VC_1738	BP	GO:0006633	Fatty acid biosynthetic process
fabV	VC_1738	BP	GO:0008152	Metabolic process
fabV	VC_1738	BP	GO:0008610	Lipid biosynthetic process
fabV	VC_1738	BP	GO:0009058	Biosynthetic process
fabV	VC_1738	BP	GO:0009987	Cellular process
fabV	VC_1738	BP	GO:0016053	Organic acid biosynthetic process
fabV	VC_1738	BP	GO:0019752	Carboxylic acid metabolic process
fabV	VC_1738	BP	GO:0032787	Monocarboxylic acid metabolic process
fabV	VC_1738	BP	GO:0043436	Oxoacid metabolic process
fabV	VC_1738	BP	GO:0044237	Cellular metabolic process
fabV	VC_1738	BP	GO:0044238	Primary metabolic process
fabV	VC_1738	BP	GO:0044249	Cellular biosynthetic process
fabV	VC_1738	BP	GO:0044255	Cellular lipid metabolic process
fabV	VC_1738	BP	GO:0044281	Small molecule metabolic process
fabV	VC_1738	BP	GO:0044283	Small molecule biosynthetic process
fabV	VC_1738	BP	GO:0046394	Carboxylic acid biosynthetic process
fabV	VC_1738	BP	GO:0071704	Organic substance metabolic process
fabV	VC_1738	BP	GO:0072330	Monocarboxylic acid biosynthetic process
fabV	VC_1738	BP	GO:1901576	Organic substance biosynthetic process
folD	VC_1942	BP	GO:0000096	Sulfur amino acid metabolic process
folD	VC_1942	BP	GO:0000097	Sulfur amino acid biosynthetic process
folD	VC_1942	BP	GO:0000105	Histidine biosynthetic process
folD	VC_1942	BP	GO:0006082	Organic acid metabolic process
folD	VC_1942	BP	GO:0006139	Nucleobase-containing compound metabolic process
folD	VC_1942	BP	GO:0006163	Purine nucleotide metabolic process
folD	VC_1942	BP	GO:0006164	Purine nucleotide biosynthetic process
folD	VC_1942	BP	GO:0006520	Cellular amino acid metabolic process
folD	VC_1942	BP	GO:0006547	Histidine metabolic process
folD	VC_1942	BP	GO:0006555	Methionine metabolic process
folD	VC_1942	BP	GO:0006575	Cellular modified amino acid metabolic process
folD	VC_1942	BP	GO:0006725	Cellular aromatic compound metabolic process
folD	VC_1942	BP	GO:0006730	One-carbon metabolic process
folD	VC_1942	BP	GO:0006753	Nucleoside phosphate metabolic process
folD	VC_1942	BP	GO:0006760	Folic acid-containing compound metabolic process
folD	VC_1942	BP	GO:0006790	Sulfur compound metabolic process
folD	VC_1942	BP	GO:0006793	Phosphorus metabolic process
folD	VC_1942	BP	GO:0006796	Phosphate-containing compound metabolic process
folD	VC_1942	BP	GO:0006807	Nitrogen compound metabolic process
folD	VC_1942	BP	GO:0008152	Metabolic process
folD	VC_1942	BP	GO:0008652	Cellular amino acid biosynthetic process
folD	VC_1942	BP	GO:0009058	Biosynthetic process
folD	VC_1942	BP	GO:0009066	Aspartate family amino acid metabolic process
folD	VC_1942	BP	GO:0009067	Aspartate family amino acid biosynthetic process
folD	VC_1942	BP	GO:0009086	Methionine biosynthetic process
folD	VC_1942	BP	GO:0009117	Nucleotide metabolic process
folD	VC_1942	BP	GO:0009165	Nucleotide biosynthetic process
folD	VC_1942	BP	GO:0009987	Cellular process
folD	VC_1942	BP	GO:0016053	Organic acid biosynthetic process
folD	VC_1942	BP	GO:0018130	Heterocycle biosynthetic process
folD	VC_1942	BP	GO:0019438	Aromatic compound biosynthetic process
folD	VC_1942	BP	GO:0019637	Organophosphate metabolic process
folD	VC_1942	BP	GO:0019752	Carboxylic acid metabolic process
folD	VC_1942	BP	GO:0034641	Cellular nitrogen compound metabolic process
folD	VC_1942	BP	GO:0034654	Nucleobase-containing compound biosynthetic process
folD	VC_1942	BP	GO:0035999	Tetrahydrofolate interconversion
folD	VC_1942	BP	GO:0042558	Pteridine-containing compound metabolic process
folD	VC_1942	BP	GO:0043436	Oxoacid metabolic process
folD	VC_1942	BP	GO:0044237	Cellular metabolic process
folD	VC_1942	BP	GO:0044238	Primary metabolic process
folD	VC_1942	BP	GO:0044249	Cellular biosynthetic process
folD	VC_1942	BP	GO:0044271	Cellular nitrogen compound biosynthetic process
folD	VC_1942	BP	GO:0044272	Sulfur compound biosynthetic process
folD	VC_1942	BP	GO:0044281	Small molecule metabolic process
folD	VC_1942	BP	GO:0044283	Small molecule biosynthetic process
folD	VC_1942	BP	GO:0046394	Carboxylic acid biosynthetic process
folD	VC_1942	BP	GO:0046483	Heterocycle metabolic process
folD	VC_1942	BP	GO:0046653	Tetrahydrofolate metabolic process
folD	VC_1942	BP	GO:0055086	Nucleobase-containing small molecule metabolic process
folD	VC_1942	BP	GO:0071704	Organic substance metabolic process
folD	VC_1942	BP	GO:0072521	Purine-containing compound metabolic process
folD	VC_1942	BP	GO:0072522	Purine-containing compound biosynthetic process
folD	VC_1942	BP	GO:0090407	Organophosphate biosynthetic process
folD	VC_1942	BP	GO:1901293	Nucleoside phosphate biosynthetic process
folD	VC_1942	BP	GO:1901360	Organic cyclic compound metabolic process
folD	VC_1942	BP	GO:1901362	Organic cyclic compound biosynthetic process
folD	VC_1942	BP	GO:1901564	Organonitrogen compound metabolic process
folD	VC_1942	BP	GO:1901566	Organonitrogen compound biosynthetic process
folD	VC_1942	BP	GO:1901576	Organic substance biosynthetic process
folD	VC_1942	BP	GO:1901605	Alpha-amino acid metabolic process
folD	VC_1942	BP	GO:1901607	Alpha-amino acid biosynthetic process
gshB	VC_0468	BP	GO:0006518	Peptide metabolic process
gshB	VC_0468	BP	GO:0006575	Cellular modified amino acid metabolic process
gshB	VC_0468	BP	GO:0006749	Glutathione metabolic process
gshB	VC_0468	BP	GO:0006750	Glutathione biosynthetic process
gshB	VC_0468	BP	GO:0006790	Sulfur compound metabolic process
gshB	VC_0468	BP	GO:0006807	Nitrogen compound metabolic process
gshB	VC_0468	BP	GO:0008152	Metabolic process
gshB	VC_0468	BP	GO:0009058	Biosynthetic process
gshB	VC_0468	BP	GO:0009987	Cellular process
gshB	VC_0468	BP	GO:0019184	Nonribosomal peptide biosynthetic process
gshB	VC_0468	BP	GO:0034641	Cellular nitrogen compound metabolic process
gshB	VC_0468	BP	GO:0042398	Cellular modified amino acid biosynthetic process
gshB	VC_0468	BP	GO:0043043	Peptide biosynthetic process
gshB	VC_0468	BP	GO:0043603	Cellular amide metabolic process
gshB	VC_0468	BP	GO:0043604	Amide biosynthetic process
gshB	VC_0468	BP	GO:0044237	Cellular metabolic process
gshB	VC_0468	BP	GO:0044249	Cellular biosynthetic process
gshB	VC_0468	BP	GO:0044271	Cellular nitrogen compound biosynthetic process
gshB	VC_0468	BP	GO:0044272	Sulfur compound biosynthetic process
gshB	VC_0468	BP	GO:0071704	Organic substance metabolic process
gshB	VC_0468	BP	GO:1901564	Organonitrogen compound metabolic process
gshB	VC_0468	BP	GO:1901566	Organonitrogen compound biosynthetic process
gshB	VC_0468	BP	GO:1901576	Organic substance biosynthetic process
lpoA	VC_0581	BP	GO:0000270	Peptidoglycan metabolic process
lpoA	VC_0581	BP	GO:0006022	Aminoglycan metabolic process
lpoA	VC_0581	BP	GO:0006023	Aminoglycan biosynthetic process
lpoA	VC_0581	BP	GO:0006024	Glycosaminoglycan biosynthetic process
lpoA	VC_0581	BP	GO:0006807	Nitrogen compound metabolic process
lpoA	VC_0581	BP	GO:0008152	Metabolic process
lpoA	VC_0581	BP	GO:0008360	Regulation of cell shape
lpoA	VC_0581	BP	GO:0009058	Biosynthetic process
lpoA	VC_0581	BP	GO:0009059	Macromolecule biosynthetic process
lpoA	VC_0581	BP	GO:0009252	Peptidoglycan biosynthetic process
lpoA	VC_0581	BP	GO:0009273	Peptidoglycan-based cell wall biogenesis
lpoA	VC_0581	BP	GO:0009987	Cellular process
lpoA	VC_0581	BP	GO:0022603	Regulation of anatomical structure morphogenesis
lpoA	VC_0581	BP	GO:0022604	Regulation of cell morphogenesis
lpoA	VC_0581	BP	GO:0030203	Glycosaminoglycan metabolic process
lpoA	VC_0581	BP	GO:0034645	Cellular macromolecule biosynthetic process
lpoA	VC_0581	BP	GO:0042546	Cell wall biogenesis
lpoA	VC_0581	BP	GO:0043170	Macromolecule metabolic process
lpoA	VC_0581	BP	GO:0044036	Cell wall macromolecule metabolic process
lpoA	VC_0581	BP	GO:0044038	Cell wall macromolecule biosynthetic process
lpoA	VC_0581	BP	GO:0044085	Cellular component biogenesis
lpoA	VC_0581	BP	GO:0044237	Cellular metabolic process
lpoA	VC_0581	BP	GO:0044249	Cellular biosynthetic process
lpoA	VC_0581	BP	GO:0044260	Cellular macromolecule metabolic process
lpoA	VC_0581	BP	GO:0050789	Regulation of biological process
lpoA	VC_0581	BP	GO:0050790	Regulation of catalytic activity
lpoA	VC_0581	BP	GO:0050793	Regulation of developmental process
lpoA	VC_0581	BP	GO:0065007	Biological regulation
lpoA	VC_0581	BP	GO:0065009	Regulation of molecular function
lpoA	VC_0581	BP	GO:0070589	Cellular component macromolecule biosynthetic process
lpoA	VC_0581	BP	GO:0071554	Cell wall organization or biogenesis
lpoA	VC_0581	BP	GO:0071704	Organic substance metabolic process
lpoA	VC_0581	BP	GO:0071840	Cellular component organization or biogenesis
lpoA	VC_0581	BP	GO:1901135	Carbohydrate derivative metabolic process
lpoA	VC_0581	BP	GO:1901137	Carbohydrate derivative biosynthetic process
lpoA	VC_0581	BP	GO:1901564	Organonitrogen compound metabolic process
lpoA	VC_0581	BP	GO:1901566	Organonitrogen compound biosynthetic process
lpoA	VC_0581	BP	GO:1901576	Organic substance biosynthetic process
pckA	VC_2738	BP	GO:0005975	Carbohydrate metabolic process
pckA	VC_2738	BP	GO:0005996	Monosaccharide metabolic process
pckA	VC_2738	BP	GO:0006006	Glucose metabolic process
pckA	VC_2738	BP	GO:0006094	Gluconeogenesis
pckA	VC_2738	BP	GO:0008152	Metabolic process
pckA	VC_2738	BP	GO:0009058	Biosynthetic process
pckA	VC_2738	BP	GO:0016051	Carbohydrate biosynthetic process
pckA	VC_2738	BP	GO:0019318	Hexose metabolic process
pckA	VC_2738	BP	GO:0019319	Hexose biosynthetic process
pckA	VC_2738	BP	GO:0044238	Primary metabolic process
pckA	VC_2738	BP	GO:0044281	Small molecule metabolic process
pckA	VC_2738	BP	GO:0044283	Small molecule biosynthetic process
pckA	VC_2738	BP	GO:0046364	Monosaccharide biosynthetic process
pckA	VC_2738	BP	GO:0071704	Organic substance metabolic process
pckA	VC_2738	BP	GO:1901576	Organic substance biosynthetic process
rpmE2	VC_0878	BP	GO:0006412	Translation
rpmE2	VC_0878	BP	GO:0006518	Peptide metabolic process
rpmE2	VC_0878	BP	GO:0006807	Nitrogen compound metabolic process
rpmE2	VC_0878	BP	GO:0008152	Metabolic process
rpmE2	VC_0878	BP	GO:0009058	Biosynthetic process
rpmE2	VC_0878	BP	GO:0009059	Macromolecule biosynthetic process
rpmE2	VC_0878	BP	GO:0009987	Cellular process
rpmE2	VC_0878	BP	GO:0010467	Gene expression
rpmE2	VC_0878	BP	GO:0019538	Protein metabolic process
rpmE2	VC_0878	BP	GO:0034641	Cellular nitrogen compound metabolic process
rpmE2	VC_0878	BP	GO:0034645	Cellular macromolecule biosynthetic process
rpmE2	VC_0878	BP	GO:0043043	Peptide biosynthetic process
rpmE2	VC_0878	BP	GO:0043170	Macromolecule metabolic process
rpmE2	VC_0878	BP	GO:0043603	Cellular amide metabolic process
rpmE2	VC_0878	BP	GO:0043604	Amide biosynthetic process
rpmE2	VC_0878	BP	GO:0044237	Cellular metabolic process
rpmE2	VC_0878	BP	GO:0044238	Primary metabolic process
rpmE2	VC_0878	BP	GO:0044249	Cellular biosynthetic process
rpmE2	VC_0878	BP	GO:0044260	Cellular macromolecule metabolic process
rpmE2	VC_0878	BP	GO:0044271	Cellular nitrogen compound biosynthetic process
rpmE2	VC_0878	BP	GO:0071704	Organic substance metabolic process
rpmE2	VC_0878	BP	GO:1901564	Organonitrogen compound metabolic process
rpmE2	VC_0878	BP	GO:1901566	Organonitrogen compound biosynthetic process
rpmE2	VC_0878	BP	GO:1901576	Organic substance biosynthetic process
rpoS	VC_0534	BP	GO:0006139	Nucleobase-containing compound metabolic process
rpoS	VC_0534	BP	GO:0006351	Transcription, DNA-templated
rpoS	VC_0534	BP	GO:0006352	DNA-templated transcription, initiation
rpoS	VC_0534	BP	GO:0006355	Regulation of transcription, DNA-templated
rpoS	VC_0534	BP	GO:0006725	Cellular aromatic compound metabolic process
rpoS	VC_0534	BP	GO:0006807	Nitrogen compound metabolic process
rpoS	VC_0534	BP	GO:0008152	Metabolic process
rpoS	VC_0534	BP	GO:0009058	Biosynthetic process
rpoS	VC_0534	BP	GO:0009059	Macromolecule biosynthetic process
rpoS	VC_0534	BP	GO:0009889	Regulation of biosynthetic process
rpoS	VC_0534	BP	GO:0009987	Cellular process
rpoS	VC_0534	BP	GO:0010467	Gene expression
rpoS	VC_0534	BP	GO:0010468	Regulation of gene expression
rpoS	VC_0534	BP	GO:0010556	Regulation of macromolecule biosynthetic process
rpoS	VC_0534	BP	GO:0016070	RNA metabolic process
rpoS	VC_0534	BP	GO:0018130	Heterocycle biosynthetic process
rpoS	VC_0534	BP	GO:0019219	Regulation of nucleobase-containing compound metabolic process
rpoS	VC_0534	BP	GO:0019222	Regulation of metabolic process
rpoS	VC_0534	BP	GO:0019438	Aromatic compound biosynthetic process
rpoS	VC_0534	BP	GO:0031323	Regulation of cellular metabolic process
rpoS	VC_0534	BP	GO:0031326	Regulation of cellular biosynthetic process
rpoS	VC_0534	BP	GO:0032774	RNA biosynthetic process
rpoS	VC_0534	BP	GO:0034641	Cellular nitrogen compound metabolic process
rpoS	VC_0534	BP	GO:0034654	Nucleobase-containing compound biosynthetic process
rpoS	VC_0534	BP	GO:0043170	Macromolecule metabolic process
rpoS	VC_0534	BP	GO:0044237	Cellular metabolic process
rpoS	VC_0534	BP	GO:0044238	Primary metabolic process
rpoS	VC_0534	BP	GO:0044249	Cellular biosynthetic process
rpoS	VC_0534	BP	GO:0044271	Cellular nitrogen compound biosynthetic process
rpoS	VC_0534	BP	GO:0046483	Heterocycle metabolic process
rpoS	VC_0534	BP	GO:0050789	Regulation of biological process
rpoS	VC_0534	BP	GO:0050794	Regulation of cellular process
rpoS	VC_0534	BP	GO:0051171	Regulation of nitrogen compound metabolic process
rpoS	VC_0534	BP	GO:0051252	Regulation of RNA metabolic process
rpoS	VC_0534	BP	GO:0060255	Regulation of macromolecule metabolic process
rpoS	VC_0534	BP	GO:0065007	Biological regulation
rpoS	VC_0534	BP	GO:0071704	Organic substance metabolic process
rpoS	VC_0534	BP	GO:0080090	Regulation of primary metabolic process
rpoS	VC_0534	BP	GO:0090304	Nucleic acid metabolic process
rpoS	VC_0534	BP	GO:0097659	Nucleic acid-templated transcription
rpoS	VC_0534	BP	GO:1901360	Organic cyclic compound metabolic process
rpoS	VC_0534	BP	GO:1901362	Organic cyclic compound biosynthetic process
rpoS	VC_0534	BP	GO:1901576	Organic substance biosynthetic process
rpoS	VC_0534	BP	GO:1903506	Regulation of nucleic acid-templated transcription
rpoS	VC_0534	BP	GO:2000142	Regulation of DNA-templated transcription, initiation
rpoS	VC_0534	BP	GO:2001141	Regulation of RNA biosynthetic process
tatB	VC_0087	BP	GO:0006810	Transport
tatB	VC_0087	BP	GO:0008104	Protein localization
tatB	VC_0087	BP	GO:0009987	Cellular process
tatB	VC_0087	BP	GO:0015031	Protein transport
tatB	VC_0087	BP	GO:0033036	Macromolecule localization
tatB	VC_0087	BP	GO:0043953	Protein transport by the Tat complex
tatB	VC_0087	BP	GO:0045184	Establishment of protein localization
tatB	VC_0087	BP	GO:0051179	Localization
tatB	VC_0087	BP	GO:0051234	Establishment of localization
tatB	VC_0087	BP	GO:0051641	Cellular localization
tatB	VC_0087	BP	GO:0055085	Transmembrane transport
tatB	VC_0087	BP	GO:0070727	Cellular macromolecule localization
tatB	VC_0087	BP	GO:0071702	Organic substance transport
tatB	VC_0087	BP	GO:0071705	Nitrogen compound transport
tatB	VC_0087	BP	GO:0071806	Protein transmembrane transport
tatC	VC_0088	BP	GO:0006810	Transport
tatC	VC_0088	BP	GO:0006886	Intracellular protein transport
tatC	VC_0088	BP	GO:0008104	Protein localization
tatC	VC_0088	BP	GO:0009987	Cellular process
tatC	VC_0088	BP	GO:0015031	Protein transport
tatC	VC_0088	BP	GO:0033036	Macromolecule localization
tatC	VC_0088	BP	GO:0043953	Protein transport by the Tat complex
tatC	VC_0088	BP	GO:0045184	Establishment of protein localization
tatC	VC_0088	BP	GO:0046907	Intracellular transport
tatC	VC_0088	BP	GO:0051179	Localization
tatC	VC_0088	BP	GO:0051234	Establishment of localization
tatC	VC_0088	BP	GO:0051641	Cellular localization
tatC	VC_0088	BP	GO:0051649	Establishment of localization in cell
tatC	VC_0088	BP	GO:0055085	Transmembrane transport
tatC	VC_0088	BP	GO:0065002	Intracellular protein transmembrane transport
tatC	VC_0088	BP	GO:0070727	Cellular macromolecule localization
tatC	VC_0088	BP	GO:0071702	Organic substance transport
tatC	VC_0088	BP	GO:0071705	Nitrogen compound transport
tatC	VC_0088	BP	GO:0071806	Protein transmembrane transport
tufA	VC_0321	BP	GO:0006412	Translation
tufA	VC_0321	BP	GO:0006414	Translational elongation
tufA	VC_0321	BP	GO:0006417	Regulation of translation
tufA	VC_0321	BP	GO:0006518	Peptide metabolic process
tufA	VC_0321	BP	GO:0006807	Nitrogen compound metabolic process
tufA	VC_0321	BP	GO:0008152	Metabolic process
tufA	VC_0321	BP	GO:0009058	Biosynthetic process
tufA	VC_0321	BP	GO:0009059	Macromolecule biosynthetic process
tufA	VC_0321	BP	GO:0009889	Regulation of biosynthetic process
tufA	VC_0321	BP	GO:0009987	Cellular process
tufA	VC_0321	BP	GO:0010467	Gene expression
tufA	VC_0321	BP	GO:0010468	Regulation of gene expression
tufA	VC_0321	BP	GO:0010556	Regulation of macromolecule biosynthetic process
tufA	VC_0321	BP	GO:0010608	Post-transcriptional regulation of gene expression
tufA	VC_0321	BP	GO:0019222	Regulation of metabolic process
tufA	VC_0321	BP	GO:0019538	Protein metabolic process
tufA	VC_0321	BP	GO:0031323	Regulation of cellular metabolic process
tufA	VC_0321	BP	GO:0031326	Regulation of cellular biosynthetic process
tufA	VC_0321	BP	GO:0034248	Regulation of cellular amide metabolic process
tufA	VC_0321	BP	GO:0034641	Cellular nitrogen compound metabolic process
tufA	VC_0321	BP	GO:0034645	Cellular macromolecule biosynthetic process
tufA	VC_0321	BP	GO:0043043	Peptide biosynthetic process
tufA	VC_0321	BP	GO:0043170	Macromolecule metabolic process
tufA	VC_0321	BP	GO:0043603	Cellular amide metabolic process
tufA	VC_0321	BP	GO:0043604	Amide biosynthetic process
tufA	VC_0321	BP	GO:0044237	Cellular metabolic process
tufA	VC_0321	BP	GO:0044238	Primary metabolic process
tufA	VC_0321	BP	GO:0044249	Cellular biosynthetic process
tufA	VC_0321	BP	GO:0044260	Cellular macromolecule metabolic process
tufA	VC_0321	BP	GO:0044271	Cellular nitrogen compound biosynthetic process
tufA	VC_0321	BP	GO:0050789	Regulation of biological process
tufA	VC_0321	BP	GO:0050794	Regulation of cellular process
tufA	VC_0321	BP	GO:0051171	Regulation of nitrogen compound metabolic process
tufA	VC_0321	BP	GO:0051246	Regulation of protein metabolic process
tufA	VC_0321	BP	GO:0060255	Regulation of macromolecule metabolic process
tufA	VC_0321	BP	GO:0065007	Biological regulation
tufA	VC_0321	BP	GO:0071704	Organic substance metabolic process
tufA	VC_0321	BP	GO:0080090	Regulation of primary metabolic process
tufA	VC_0321	BP	GO:1901564	Organonitrogen compound metabolic process
tufA	VC_0321	BP	GO:1901566	Organonitrogen compound biosynthetic process
tufA	VC_0321	BP	GO:1901576	Organic substance biosynthetic process
tufA	VC_0321	BP	GO:2000112	Regulation of cellular macromolecule biosynthetic process
tufB	VC_0362	BP	GO:0006412	Translation
tufB	VC_0362	BP	GO:0006414	Translational elongation
tufB	VC_0362	BP	GO:0006417	Regulation of translation
tufB	VC_0362	BP	GO:0006518	Peptide metabolic process
tufB	VC_0362	BP	GO:0006807	Nitrogen compound metabolic process
tufB	VC_0362	BP	GO:0008152	Metabolic process
tufB	VC_0362	BP	GO:0009058	Biosynthetic process
tufB	VC_0362	BP	GO:0009059	Macromolecule biosynthetic process
tufB	VC_0362	BP	GO:0009889	Regulation of biosynthetic process
tufB	VC_0362	BP	GO:0009987	Cellular process
tufB	VC_0362	BP	GO:0010467	Gene expression
tufB	VC_0362	BP	GO:0010468	Regulation of gene expression
tufB	VC_0362	BP	GO:0010556	Regulation of macromolecule biosynthetic process
tufB	VC_0362	BP	GO:0010608	Post-transcriptional regulation of gene expression
tufB	VC_0362	BP	GO:0019222	Regulation of metabolic process
tufB	VC_0362	BP	GO:0019538	Protein metabolic process
tufB	VC_0362	BP	GO:0031323	Regulation of cellular metabolic process
tufB	VC_0362	BP	GO:0031326	Regulation of cellular biosynthetic process
tufB	VC_0362	BP	GO:0034248	Regulation of cellular amide metabolic process
tufB	VC_0362	BP	GO:0034641	Cellular nitrogen compound metabolic process
tufB	VC_0362	BP	GO:0034645	Cellular macromolecule biosynthetic process
tufB	VC_0362	BP	GO:0043043	Peptide biosynthetic process
tufB	VC_0362	BP	GO:0043170	Macromolecule metabolic process
tufB	VC_0362	BP	GO:0043603	Cellular amide metabolic process
tufB	VC_0362	BP	GO:0043604	Amide biosynthetic process
tufB	VC_0362	BP	GO:0044237	Cellular metabolic process
tufB	VC_0362	BP	GO:0044238	Primary metabolic process
tufB	VC_0362	BP	GO:0044249	Cellular biosynthetic process
tufB	VC_0362	BP	GO:0044260	Cellular macromolecule metabolic process
tufB	VC_0362	BP	GO:0044271	Cellular nitrogen compound biosynthetic process
tufB	VC_0362	BP	GO:0050789	Regulation of biological process
tufB	VC_0362	BP	GO:0050794	Regulation of cellular process
tufB	VC_0362	BP	GO:0051171	Regulation of nitrogen compound metabolic process
tufB	VC_0362	BP	GO:0051246	Regulation of protein metabolic process
tufB	VC_0362	BP	GO:0060255	Regulation of macromolecule metabolic process
tufB	VC_0362	BP	GO:0065007	Biological regulation
tufB	VC_0362	BP	GO:0071704	Organic substance metabolic process
tufB	VC_0362	BP	GO:0080090	Regulation of primary metabolic process
tufB	VC_0362	BP	GO:1901564	Organonitrogen compound metabolic process
tufB	VC_0362	BP	GO:1901566	Organonitrogen compound biosynthetic process
tufB	VC_0362	BP	GO:1901576	Organic substance biosynthetic process
tufB	VC_0362	BP	GO:2000112	Regulation of cellular macromolecule biosynthetic process
VC_0016	VC_0016	BP	GO:0006355	Regulation of transcription, DNA-templated
VC_0016	VC_0016	BP	GO:0009889	Regulation of biosynthetic process
VC_0016	VC_0016	BP	GO:0010468	Regulation of gene expression
VC_0016	VC_0016	BP	GO:0010556	Regulation of macromolecule biosynthetic process
VC_0016	VC_0016	BP	GO:0019219	Regulation of nucleobase-containing compound metabolic process
VC_0016	VC_0016	BP	GO:0019222	Regulation of metabolic process
VC_0016	VC_0016	BP	GO:0031323	Regulation of cellular metabolic process
VC_0016	VC_0016	BP	GO:0031326	Regulation of cellular biosynthetic process
VC_0016	VC_0016	BP	GO:0032784	Regulation of DNA-templated transcription, elongation
VC_0016	VC_0016	BP	GO:0050789	Regulation of biological process
VC_0016	VC_0016	BP	GO:0050794	Regulation of cellular process
VC_0016	VC_0016	BP	GO:0051171	Regulation of nitrogen compound metabolic process
VC_0016	VC_0016	BP	GO:0051252	Regulation of RNA metabolic process
VC_0016	VC_0016	BP	GO:0060255	Regulation of macromolecule metabolic process
VC_0016	VC_0016	BP	GO:0065007	Biological regulation
VC_0016	VC_0016	BP	GO:0080090	Regulation of primary metabolic process
VC_0016	VC_0016	BP	GO:1903506	Regulation of nucleic acid-templated transcription
VC_0016	VC_0016	BP	GO:2001141	Regulation of RNA biosynthetic process
VC_0396	VC_0396	BP	GO:0006355	Regulation of transcription, DNA-templated
VC_0396	VC_0396	BP	GO:0009889	Regulation of biosynthetic process
VC_0396	VC_0396	BP	GO:0010468	Regulation of gene expression
VC_0396	VC_0396	BP	GO:0010556	Regulation of macromolecule biosynthetic process
VC_0396	VC_0396	BP	GO:0019219	Regulation of nucleobase-containing compound metabolic process
VC_0396	VC_0396	BP	GO:0019222	Regulation of metabolic process
VC_0396	VC_0396	BP	GO:0031323	Regulation of cellular metabolic process
VC_0396	VC_0396	BP	GO:0031326	Regulation of cellular biosynthetic process
VC_0396	VC_0396	BP	GO:0050789	Regulation of biological process
VC_0396	VC_0396	BP	GO:0050794	Regulation of cellular process
VC_0396	VC_0396	BP	GO:0051171	Regulation of nitrogen compound metabolic process
VC_0396	VC_0396	BP	GO:0051252	Regulation of RNA metabolic process
VC_0396	VC_0396	BP	GO:0060255	Regulation of macromolecule metabolic process
VC_0396	VC_0396	BP	GO:0065007	Biological regulation
VC_0396	VC_0396	BP	GO:0080090	Regulation of primary metabolic process
VC_0396	VC_0396	BP	GO:1903506	Regulation of nucleic acid-templated transcription
VC_0396	VC_0396	BP	GO:2001141	Regulation of RNA biosynthetic process
VC_0783	VC_0783	BP	GO:0006082	Organic acid metabolic process
VC_0783	VC_0783	BP	GO:0006790	Sulfur compound metabolic process
VC_0783	VC_0783	BP	GO:0006805	Xenobiotic metabolic process
VC_0783	VC_0783	BP	GO:0008152	Metabolic process
VC_0783	VC_0783	BP	GO:0009410	Response to xenobiotic stimulus
VC_0783	VC_0783	BP	GO:0009987	Cellular process
VC_0783	VC_0783	BP	GO:0018909	Dodecyl sulfate metabolic process
VC_0783	VC_0783	BP	GO:0042221	Response to chemical
VC_0783	VC_0783	BP	GO:0043436	Oxoacid metabolic process
VC_0783	VC_0783	BP	GO:0044237	Cellular metabolic process
VC_0783	VC_0783	BP	GO:0044281	Small molecule metabolic process
VC_0783	VC_0783	BP	GO:0050896	Response to stimulus
VC_0783	VC_0783	BP	GO:0051716	Cellular response to stimulus
VC_0783	VC_0783	BP	GO:0070887	Cellular response to chemical stimulus
VC_0783	VC_0783	BP	GO:0071466	Cellular response to xenobiotic stimulus
VC_0783	VC_0783	BP	GO:0071704	Organic substance metabolic process
VC_0870	VC_0870	BP	GO:0006139	Nucleobase-containing compound metabolic process
VC_0870	VC_0870	BP	GO:0006259	DNA metabolic process
VC_0870	VC_0870	BP	GO:0006310	DNA recombination
VC_0870	VC_0870	BP	GO:0006313	Transposition, DNA-mediated
VC_0870	VC_0870	BP	GO:0006725	Cellular aromatic compound metabolic process
VC_0870	VC_0870	BP	GO:0006807	Nitrogen compound metabolic process
VC_0870	VC_0870	BP	GO:0008152	Metabolic process
VC_0870	VC_0870	BP	GO:0009987	Cellular process
VC_0870	VC_0870	BP	GO:0032196	Transposition
VC_0870	VC_0870	BP	GO:0034641	Cellular nitrogen compound metabolic process
VC_0870	VC_0870	BP	GO:0043170	Macromolecule metabolic process
VC_0870	VC_0870	BP	GO:0044237	Cellular metabolic process
VC_0870	VC_0870	BP	GO:0044238	Primary metabolic process
VC_0870	VC_0870	BP	GO:0044260	Cellular macromolecule metabolic process
VC_0870	VC_0870	BP	GO:0046483	Heterocycle metabolic process
VC_0870	VC_0870	BP	GO:0071704	Organic substance metabolic process
VC_0870	VC_0870	BP	GO:0090304	Nucleic acid metabolic process
VC_0870	VC_0870	BP	GO:1901360	Organic cyclic compound metabolic process
VC_0876	VC_0876	BP	GO:0001510	RNA methylation
VC_0876	VC_0876	BP	GO:0006139	Nucleobase-containing compound metabolic process
VC_0876	VC_0876	BP	GO:0006396	RNA processing
VC_0876	VC_0876	BP	GO:0006399	tRNA metabolic process
VC_0876	VC_0876	BP	GO:0006400	tRNA modification
VC_0876	VC_0876	BP	GO:0006725	Cellular aromatic compound metabolic process
VC_0876	VC_0876	BP	GO:0006807	Nitrogen compound metabolic process
VC_0876	VC_0876	BP	GO:0008033	tRNA processing
VC_0876	VC_0876	BP	GO:0008152	Metabolic process
VC_0876	VC_0876	BP	GO:0009451	RNA modification
VC_0876	VC_0876	BP	GO:0009987	Cellular process
VC_0876	VC_0876	BP	GO:0010467	Gene expression
VC_0876	VC_0876	BP	GO:0016070	RNA metabolic process
VC_0876	VC_0876	BP	GO:0030488	tRNA methylation
VC_0876	VC_0876	BP	GO:0032259	Methylation
VC_0876	VC_0876	BP	GO:0034470	ncRNA processing
VC_0876	VC_0876	BP	GO:0034641	Cellular nitrogen compound metabolic process
VC_0876	VC_0876	BP	GO:0034660	ncRNA metabolic process
VC_0876	VC_0876	BP	GO:0043170	Macromolecule metabolic process
VC_0876	VC_0876	BP	GO:0043412	Macromolecule modification
VC_0876	VC_0876	BP	GO:0043414	Macromolecule methylation
VC_0876	VC_0876	BP	GO:0044237	Cellular metabolic process
VC_0876	VC_0876	BP	GO:0044238	Primary metabolic process
VC_0876	VC_0876	BP	GO:0044260	Cellular macromolecule metabolic process
VC_0876	VC_0876	BP	GO:0046483	Heterocycle metabolic process
VC_0876	VC_0876	BP	GO:0071704	Organic substance metabolic process
VC_0876	VC_0876	BP	GO:0090304	Nucleic acid metabolic process
VC_0876	VC_0876	BP	GO:1901360	Organic cyclic compound metabolic process
VC_0937	VC_0937	BP	GO:0000271	Polysaccharide biosynthetic process
VC_0937	VC_0937	BP	GO:0005975	Carbohydrate metabolic process
VC_0937	VC_0937	BP	GO:0005976	Polysaccharide metabolic process
VC_0937	VC_0937	BP	GO:0006468	Protein phosphorylation
VC_0937	VC_0937	BP	GO:0006629	Lipid metabolic process
VC_0937	VC_0937	BP	GO:0006793	Phosphorus metabolic process
VC_0937	VC_0937	BP	GO:0006796	Phosphate-containing compound metabolic process
VC_0937	VC_0937	BP	GO:0006807	Nitrogen compound metabolic process
VC_0937	VC_0937	BP	GO:0008152	Metabolic process
VC_0937	VC_0937	BP	GO:0008610	Lipid biosynthetic process
VC_0937	VC_0937	BP	GO:0008653	Lipopolysaccharide metabolic process
VC_0937	VC_0937	BP	GO:0009058	Biosynthetic process
VC_0937	VC_0937	BP	GO:0009059	Macromolecule biosynthetic process
VC_0937	VC_0937	BP	GO:0009103	Lipopolysaccharide biosynthetic process
VC_0937	VC_0937	BP	GO:0009987	Cellular process
VC_0937	VC_0937	BP	GO:0016051	Carbohydrate biosynthetic process
VC_0937	VC_0937	BP	GO:0016310	Phosphorylation
VC_0937	VC_0937	BP	GO:0018108	Peptidyl-tyrosine phosphorylation
VC_0937	VC_0937	BP	GO:0018193	Peptidyl-amino acid modification
VC_0937	VC_0937	BP	GO:0018212	Peptidyl-tyrosine modification
VC_0937	VC_0937	BP	GO:0019538	Protein metabolic process
VC_0937	VC_0937	BP	GO:0033692	Cellular polysaccharide biosynthetic process
VC_0937	VC_0937	BP	GO:0034637	Cellular carbohydrate biosynthetic process
VC_0937	VC_0937	BP	GO:0034645	Cellular macromolecule biosynthetic process
VC_0937	VC_0937	BP	GO:0036211	Protein modification process
VC_0937	VC_0937	BP	GO:0043170	Macromolecule metabolic process
VC_0937	VC_0937	BP	GO:0043412	Macromolecule modification
VC_0937	VC_0937	BP	GO:0044237	Cellular metabolic process
VC_0937	VC_0937	BP	GO:0044238	Primary metabolic process
VC_0937	VC_0937	BP	GO:0044249	Cellular biosynthetic process
VC_0937	VC_0937	BP	GO:0044255	Cellular lipid metabolic process
VC_0937	VC_0937	BP	GO:0044260	Cellular macromolecule metabolic process
VC_0937	VC_0937	BP	GO:0044262	Cellular carbohydrate metabolic process
VC_0937	VC_0937	BP	GO:0044264	Cellular polysaccharide metabolic process
VC_0937	VC_0937	BP	GO:0045226	Extracellular polysaccharide biosynthetic process
VC_0937	VC_0937	BP	GO:0046379	Extracellular polysaccharide metabolic process
VC_0937	VC_0937	BP	GO:0071704	Organic substance metabolic process
VC_0937	VC_0937	BP	GO:1901135	Carbohydrate derivative metabolic process
VC_0937	VC_0937	BP	GO:1901137	Carbohydrate derivative biosynthetic process
VC_0937	VC_0937	BP	GO:1901564	Organonitrogen compound metabolic process
VC_0937	VC_0937	BP	GO:1901576	Organic substance biosynthetic process
VC_0937	VC_0937	BP	GO:1903509	Liposaccharide metabolic process
VC_1091	VC_1091	BP	GO:0006810	Transport
VC_1091	VC_1091	BP	GO:0009987	Cellular process
VC_1091	VC_1091	BP	GO:0015833	Peptide transport
VC_1091	VC_1091	BP	GO:0042886	Amide transport
VC_1091	VC_1091	BP	GO:0051179	Localization
VC_1091	VC_1091	BP	GO:0051234	Establishment of localization
VC_1091	VC_1091	BP	GO:0055085	Transmembrane transport
VC_1091	VC_1091	BP	GO:0071702	Organic substance transport
VC_1091	VC_1091	BP	GO:0071705	Nitrogen compound transport
VC_1290	VC_1290	BP	GO:0006139	Nucleobase-containing compound metabolic process
VC_1290	VC_1290	BP	GO:0006725	Cellular aromatic compound metabolic process
VC_1290	VC_1290	BP	GO:0006807	Nitrogen compound metabolic process
VC_1290	VC_1290	BP	GO:0008152	Metabolic process
VC_1290	VC_1290	BP	GO:0009987	Cellular process
VC_1290	VC_1290	BP	GO:0034641	Cellular nitrogen compound metabolic process
VC_1290	VC_1290	BP	GO:0043170	Macromolecule metabolic process
VC_1290	VC_1290	BP	GO:0044237	Cellular metabolic process
VC_1290	VC_1290	BP	GO:0044238	Primary metabolic process
VC_1290	VC_1290	BP	GO:0046483	Heterocycle metabolic process
VC_1290	VC_1290	BP	GO:0071704	Organic substance metabolic process
VC_1290	VC_1290	BP	GO:0090304	Nucleic acid metabolic process
VC_1290	VC_1290	BP	GO:0090305	Nucleic acid phosphodiester bond hydrolysis
VC_1290	VC_1290	BP	GO:1901360	Organic cyclic compound metabolic process
VC_1448	VC_1448	BP	GO:0006508	Proteolysis
VC_1448	VC_1448	BP	GO:0006807	Nitrogen compound metabolic process
VC_1448	VC_1448	BP	GO:0006810	Transport
VC_1448	VC_1448	BP	GO:0008104	Protein localization
VC_1448	VC_1448	BP	GO:0008152	Metabolic process
VC_1448	VC_1448	BP	GO:0009306	Protein secretion
VC_1448	VC_1448	BP	GO:0009987	Cellular process
VC_1448	VC_1448	BP	GO:0015031	Protein transport
VC_1448	VC_1448	BP	GO:0019538	Protein metabolic process
VC_1448	VC_1448	BP	GO:0030253	Protein secretion by the type I secretion system
VC_1448	VC_1448	BP	GO:0032940	Secretion by cell
VC_1448	VC_1448	BP	GO:0033036	Macromolecule localization
VC_1448	VC_1448	BP	GO:0035592	Establishment of protein localization to extracellular region
VC_1448	VC_1448	BP	GO:0043170	Macromolecule metabolic process
VC_1448	VC_1448	BP	GO:0044238	Primary metabolic process
VC_1448	VC_1448	BP	GO:0045184	Establishment of protein localization
VC_1448	VC_1448	BP	GO:0046903	Secretion
VC_1448	VC_1448	BP	GO:0051179	Localization
VC_1448	VC_1448	BP	GO:0051234	Establishment of localization
VC_1448	VC_1448	BP	GO:0051641	Cellular localization
VC_1448	VC_1448	BP	GO:0055085	Transmembrane transport
VC_1448	VC_1448	BP	GO:0070727	Cellular macromolecule localization
VC_1448	VC_1448	BP	GO:0071692	Protein localization to extracellular region
VC_1448	VC_1448	BP	GO:0071702	Organic substance transport
VC_1448	VC_1448	BP	GO:0071704	Organic substance metabolic process
VC_1448	VC_1448	BP	GO:0071705	Nitrogen compound transport
VC_1448	VC_1448	BP	GO:0071806	Protein transmembrane transport
VC_1448	VC_1448	BP	GO:0140352	Export from cell
VC_1448	VC_1448	BP	GO:1901564	Organonitrogen compound metabolic process
VC_1454	VC_1454	BP	GO:0006139	Nucleobase-containing compound metabolic process
VC_1454	VC_1454	BP	GO:0006259	DNA metabolic process
VC_1454	VC_1454	BP	GO:0006260	DNA replication
VC_1454	VC_1454	BP	GO:0006261	DNA-templated DNA replication
VC_1454	VC_1454	BP	GO:0006270	DNA replication initiation
VC_1454	VC_1454	BP	GO:0006725	Cellular aromatic compound metabolic process
VC_1454	VC_1454	BP	GO:0006807	Nitrogen compound metabolic process
VC_1454	VC_1454	BP	GO:0008152	Metabolic process
VC_1454	VC_1454	BP	GO:0009987	Cellular process
VC_1454	VC_1454	BP	GO:0034641	Cellular nitrogen compound metabolic process
VC_1454	VC_1454	BP	GO:0043170	Macromolecule metabolic process
VC_1454	VC_1454	BP	GO:0044237	Cellular metabolic process
VC_1454	VC_1454	BP	GO:0044238	Primary metabolic process
VC_1454	VC_1454	BP	GO:0044260	Cellular macromolecule metabolic process
VC_1454	VC_1454	BP	GO:0046483	Heterocycle metabolic process
VC_1454	VC_1454	BP	GO:0071704	Organic substance metabolic process
VC_1454	VC_1454	BP	GO:0090304	Nucleic acid metabolic process
VC_1454	VC_1454	BP	GO:1901360	Organic cyclic compound metabolic process
VC_1469	VC_1469	BP	GO:0006139	Nucleobase-containing compound metabolic process
VC_1469	VC_1469	BP	GO:0006259	DNA metabolic process
VC_1469	VC_1469	BP	GO:0006260	DNA replication
VC_1469	VC_1469	BP	GO:0006725	Cellular aromatic compound metabolic process
VC_1469	VC_1469	BP	GO:0006807	Nitrogen compound metabolic process
VC_1469	VC_1469	BP	GO:0008152	Metabolic process
VC_1469	VC_1469	BP	GO:0009987	Cellular process
VC_1469	VC_1469	BP	GO:0034641	Cellular nitrogen compound metabolic process
VC_1469	VC_1469	BP	GO:0043170	Macromolecule metabolic process
VC_1469	VC_1469	BP	GO:0044237	Cellular metabolic process
VC_1469	VC_1469	BP	GO:0044238	Primary metabolic process
VC_1469	VC_1469	BP	GO:0044260	Cellular macromolecule metabolic process
VC_1469	VC_1469	BP	GO:0046483	Heterocycle metabolic process
VC_1469	VC_1469	BP	GO:0071704	Organic substance metabolic process
VC_1469	VC_1469	BP	GO:0090304	Nucleic acid metabolic process
VC_1469	VC_1469	BP	GO:1901360	Organic cyclic compound metabolic process
VC_1494	VC_1494	BP	GO:0006508	Proteolysis
VC_1494	VC_1494	BP	GO:0006807	Nitrogen compound metabolic process
VC_1494	VC_1494	BP	GO:0008152	Metabolic process
VC_1494	VC_1494	BP	GO:0019538	Protein metabolic process
VC_1494	VC_1494	BP	GO:0043170	Macromolecule metabolic process
VC_1494	VC_1494	BP	GO:0044238	Primary metabolic process
VC_1494	VC_1494	BP	GO:0071704	Organic substance metabolic process
VC_1494	VC_1494	BP	GO:1901564	Organonitrogen compound metabolic process
VC_1967	VC_1967	BP	GO:0006935	Chemotaxis
VC_1967	VC_1967	BP	GO:0007154	Cell communication
VC_1967	VC_1967	BP	GO:0007165	Signal transduction
VC_1967	VC_1967	BP	GO:0009605	Response to external stimulus
VC_1967	VC_1967	BP	GO:0009987	Cellular process
VC_1967	VC_1967	BP	GO:0023052	Signaling
VC_1967	VC_1967	BP	GO:0040011	Locomotion
VC_1967	VC_1967	BP	GO:0042221	Response to chemical
VC_1967	VC_1967	BP	GO:0042330	Taxis
VC_1967	VC_1967	BP	GO:0050789	Regulation of biological process
VC_1967	VC_1967	BP	GO:0050794	Regulation of cellular process
VC_1967	VC_1967	BP	GO:0050896	Response to stimulus
VC_1967	VC_1967	BP	GO:0051716	Cellular response to stimulus
VC_1967	VC_1967	BP	GO:0065007	Biological regulation
VC_2285	VC_2285	BP	GO:0007155	Cell adhesion
VC_2285	VC_2285	BP	GO:0009987	Cellular process
VC_2285	VC_2285	BP	GO:0031589	Cell-substrate adhesion
VC_2285	VC_2285	BP	GO:0040012	Regulation of locomotion
VC_2285	VC_2285	BP	GO:0040013	Negative regulation of locomotion
VC_2285	VC_2285	BP	GO:0042710	Biofilm formation
VC_2285	VC_2285	BP	GO:0043708	Cell adhesion involved in biofilm formation
VC_2285	VC_2285	BP	GO:0043709	Cell adhesion involved in single-species biofilm formation
VC_2285	VC_2285	BP	GO:0044010	Single-species biofilm formation
VC_2285	VC_2285	BP	GO:0048519	Negative regulation of biological process
VC_2285	VC_2285	BP	GO:0048523	Negative regulation of cellular process
VC_2285	VC_2285	BP	GO:0050789	Regulation of biological process
VC_2285	VC_2285	BP	GO:0050794	Regulation of cellular process
VC_2285	VC_2285	BP	GO:0051703	Biological process involved in intraspecies interaction between organisms
VC_2285	VC_2285	BP	GO:0065007	Biological regulation
VC_2285	VC_2285	BP	GO:0090605	Submerged biofilm formation
VC_2285	VC_2285	BP	GO:0090609	Single-species submerged biofilm formation
VC_2285	VC_2285	BP	GO:0098630	Aggregation of unicellular organisms
VC_2285	VC_2285	BP	GO:0098743	Cell aggregation
VC_2285	VC_2285	BP	GO:1902021	Regulation of bacterial-type flagellum-dependent cell motility
VC_2285	VC_2285	BP	GO:1902201	Negative regulation of bacterial-type flagellum-dependent cell motility
VC_2285	VC_2285	BP	GO:2000145	Regulation of cell motility
VC_2285	VC_2285	BP	GO:2000146	Negative regulation of cell motility
VC_2534	VC_2534	BP	GO:0006810	Transport
VC_2534	VC_2534	BP	GO:0006811	Ion transport
VC_2534	VC_2534	BP	GO:0006812	Cation transport
VC_2534	VC_2534	BP	GO:0009987	Cellular process
VC_2534	VC_2534	BP	GO:0015693	Magnesium ion transport
VC_2534	VC_2534	BP	GO:0030001	Metal ion transport
VC_2534	VC_2534	BP	GO:0034220	Ion transmembrane transport
VC_2534	VC_2534	BP	GO:0051179	Localization
VC_2534	VC_2534	BP	GO:0051234	Establishment of localization
VC_2534	VC_2534	BP	GO:0055085	Transmembrane transport
VC_2534	VC_2534	BP	GO:0098655	Cation transmembrane transport
VC_2534	VC_2534	BP	GO:0098660	Inorganic ion transmembrane transport
VC_2534	VC_2534	BP	GO:0098662	Inorganic cation transmembrane transport
VC_2534	VC_2534	BP	GO:1903830	Magnesium ion transmembrane transport
VC_2561	VC_2561	BP	GO:0006725	Cellular aromatic compound metabolic process
VC_2561	VC_2561	BP	GO:0006778	Porphyrin-containing compound metabolic process
VC_2561	VC_2561	BP	GO:0006779	Porphyrin-containing compound biosynthetic process
VC_2561	VC_2561	BP	GO:0006783	Heme biosynthetic process
VC_2561	VC_2561	BP	GO:0006807	Nitrogen compound metabolic process
VC_2561	VC_2561	BP	GO:0008152	Metabolic process
VC_2561	VC_2561	BP	GO:0009058	Biosynthetic process
VC_2561	VC_2561	BP	GO:0009987	Cellular process
VC_2561	VC_2561	BP	GO:0018130	Heterocycle biosynthetic process
VC_2561	VC_2561	BP	GO:0019354	Siroheme biosynthetic process
VC_2561	VC_2561	BP	GO:0019438	Aromatic compound biosynthetic process
VC_2561	VC_2561	BP	GO:0032259	Methylation
VC_2561	VC_2561	BP	GO:0033013	Tetrapyrrole metabolic process
VC_2561	VC_2561	BP	GO:0033014	Tetrapyrrole biosynthetic process
VC_2561	VC_2561	BP	GO:0034641	Cellular nitrogen compound metabolic process
VC_2561	VC_2561	BP	GO:0042168	Heme metabolic process
VC_2561	VC_2561	BP	GO:0042440	Pigment metabolic process
VC_2561	VC_2561	BP	GO:0044237	Cellular metabolic process
VC_2561	VC_2561	BP	GO:0044249	Cellular biosynthetic process
VC_2561	VC_2561	BP	GO:0044271	Cellular nitrogen compound biosynthetic process
VC_2561	VC_2561	BP	GO:0046148	Pigment biosynthetic process
VC_2561	VC_2561	BP	GO:0046156	Siroheme metabolic process
VC_2561	VC_2561	BP	GO:0046483	Heterocycle metabolic process
VC_2561	VC_2561	BP	GO:0071704	Organic substance metabolic process
VC_2561	VC_2561	BP	GO:1901360	Organic cyclic compound metabolic process
VC_2561	VC_2561	BP	GO:1901362	Organic cyclic compound biosynthetic process
VC_2561	VC_2561	BP	GO:1901564	Organonitrogen compound metabolic process
VC_2561	VC_2561	BP	GO:1901566	Organonitrogen compound biosynthetic process
VC_2561	VC_2561	BP	GO:1901576	Organic substance biosynthetic process
VC_2699	VC_2699	BP	GO:0006810	Transport
VC_2699	VC_2699	BP	GO:0006811	Ion transport
VC_2699	VC_2699	BP	GO:0006820	Anion transport
VC_2699	VC_2699	BP	GO:0006835	Dicarboxylic acid transport
VC_2699	VC_2699	BP	GO:0009987	Cellular process
VC_2699	VC_2699	BP	GO:0015711	Organic anion transport
VC_2699	VC_2699	BP	GO:0015740	C4-dicarboxylate transport
VC_2699	VC_2699	BP	GO:0034220	Ion transmembrane transport
VC_2699	VC_2699	BP	GO:0046942	Carboxylic acid transport
VC_2699	VC_2699	BP	GO:0051179	Localization
VC_2699	VC_2699	BP	GO:0051234	Establishment of localization
VC_2699	VC_2699	BP	GO:0055085	Transmembrane transport
VC_2699	VC_2699	BP	GO:0071702	Organic substance transport
VC_2699	VC_2699	BP	GO:0098656	Anion transmembrane transport
VC_A0283	VC_A0283	BP	GO:0007017	Microtubule-based process
VC_A0283	VC_A0283	BP	GO:0009987	Cellular process
add	VC_2751	CC	GO:0005622	Intracellular anatomical structure
add	VC_2751	CC	GO:0005737	Cytoplasm
add	VC_2751	CC	GO:0005829	Cytosol
add	VC_2751	CC	GO:0110165	Cellular anatomical entity
add	VC_2751	CC	GOCC:0005622	Intracellular
blc	VC_A0317	CC	GO:0005622	Intracellular anatomical structure
blc	VC_A0317	CC	GO:0005737	Cytoplasm
blc	VC_A0317	CC	GO:0009279	Cell outer membrane
blc	VC_A0317	CC	GO:0016020	Membrane
blc	VC_A0317	CC	GO:0019867	Outer membrane
blc	VC_A0317	CC	GO:0030312	External encapsulating structure
blc	VC_A0317	CC	GO:0030313	Cell envelope
blc	VC_A0317	CC	GO:0031975	Envelope
blc	VC_A0317	CC	GO:0071944	Cell periphery
blc	VC_A0317	CC	GO:0110165	Cellular anatomical entity
dapF	VC_0126	CC	GO:0005622	Intracellular anatomical structure
dapF	VC_0126	CC	GO:0005737	Cytoplasm
dapF	VC_0126	CC	GO:0005829	Cytosol
dapF	VC_0126	CC	GO:0110165	Cellular anatomical entity
dapF	VC_0126	CC	GOCC:0005622	Intracellular
fabH1	VC_2023	CC	GO:0005622	Intracellular anatomical structure
fabH1	VC_2023	CC	GO:0005737	Cytoplasm
fabH1	VC_2023	CC	GO:0110165	Cellular anatomical entity
fabH1	VC_2023	CC	GOCC:0005622	Intracellular
fabH1	VC_2023	CC	GOCC:0005829	Cytosol
folD	VC_1942	CC	GO:0005622	Intracellular anatomical structure
folD	VC_1942	CC	GO:0005737	Cytoplasm
folD	VC_1942	CC	GO:0005829	Cytosol
folD	VC_1942	CC	GO:0110165	Cellular anatomical entity
folD	VC_1942	CC	GOCC:0005622	Intracellular
gshB	VC_0468	CC	GO:0005622	Intracellular anatomical structure
gshB	VC_0468	CC	GO:0005737	Cytoplasm
gshB	VC_0468	CC	GO:0110165	Cellular anatomical entity
gshB	VC_0468	CC	GOCC:0005622	Intracellular
gshB	VC_0468	CC	GOCC:0005829	Cytosol
lpoA	VC_0581	CC	GO:0009279	Cell outer membrane
lpoA	VC_0581	CC	GO:0016020	Membrane
lpoA	VC_0581	CC	GO:0019867	Outer membrane
lpoA	VC_0581	CC	GO:0030312	External encapsulating structure
lpoA	VC_0581	CC	GO:0030313	Cell envelope
lpoA	VC_0581	CC	GO:0031241	Periplasmic side of cell outer membrane
lpoA	VC_0581	CC	GO:0031975	Envelope
lpoA	VC_0581	CC	GO:0071944	Cell periphery
lpoA	VC_0581	CC	GO:0098552	Side of membrane
lpoA	VC_0581	CC	GO:0110165	Cellular anatomical entity
pckA	VC_2738	CC	GO:0005622	Intracellular anatomical structure
pckA	VC_2738	CC	GO:0005737	Cytoplasm
pckA	VC_2738	CC	GO:0005829	Cytosol
pckA	VC_2738	CC	GO:0110165	Cellular anatomical entity
pckA	VC_2738	CC	GOCC:0005622	Intracellular
rpmE2	VC_0878	CC	GO:0005622	Intracellular anatomical structure
rpmE2	VC_0878	CC	GO:0005840	Ribosome
rpmE2	VC_0878	CC	GO:0043226	Organelle
rpmE2	VC_0878	CC	GO:0043228	Non-membrane-bounded organelle
rpmE2	VC_0878	CC	GO:0043229	Intracellular organelle
rpmE2	VC_0878	CC	GO:0043232	Intracellular non-membrane-bounded organelle
rpmE2	VC_0878	CC	GO:0110165	Cellular anatomical entity
rpmE2	VC_0878	CC	GOCC:0005622	Intracellular
rpmE2	VC_0878	CC	GOCC:0005737	Cytoplasm
rpmE2	VC_0878	CC	GOCC:0005829	Cytosol
rpmE2	VC_0878	CC	GOCC:0015934	Large ribosomal subunit
rpmE2	VC_0878	CC	GOCC:0022625	Cytosolic large ribosomal subunit
rpmE2	VC_0878	CC	GOCC:0022626	Cytosolic ribosome
rpmE2	VC_0878	CC	GOCC:0032991	Protein-containing complex
rpmE2	VC_0878	CC	GOCC:0044391	Ribosomal subunit
rpmE2	VC_0878	CC	GOCC:1990904	Ribonucleoprotein complex
rpoS	VC_0534	CC	GO:0005622	Intracellular anatomical structure
rpoS	VC_0534	CC	GO:0005737	Cytoplasm
rpoS	VC_0534	CC	GO:0110165	Cellular anatomical entity
rpoS	VC_0534	CC	GOCC:0000428	DNA-directed RNA polymerase complex
rpoS	VC_0534	CC	GOCC:0005622	Intracellular
rpoS	VC_0534	CC	GOCC:0030880	RNA polymerase complex
rpoS	VC_0534	CC	GOCC:0032991	Protein-containing complex
rpoS	VC_0534	CC	GOCC:0061695	Transferase complex, transferring phosphorus-containing groups
rpoS	VC_0534	CC	GOCC:1902494	Catalytic complex
rpoS	VC_0534	CC	GOCC:1990234	Transferase complex
tatB	VC_0087	CC	GO:0005886	Plasma membrane
tatB	VC_0087	CC	GO:0005887	Integral component of plasma membrane
tatB	VC_0087	CC	GO:0016020	Membrane
tatB	VC_0087	CC	GO:0016021	Integral component of membrane
tatB	VC_0087	CC	GO:0031224	Intrinsic component of membrane
tatB	VC_0087	CC	GO:0031226	Intrinsic component of plasma membrane
tatB	VC_0087	CC	GO:0032991	Protein-containing complex
tatB	VC_0087	CC	GO:0033281	TAT protein transport complex
tatB	VC_0087	CC	GO:0071944	Cell periphery
tatB	VC_0087	CC	GO:0098796	Membrane protein complex
tatB	VC_0087	CC	GO:0098797	Plasma membrane protein complex
tatB	VC_0087	CC	GO:0110165	Cellular anatomical entity
tatC	VC_0088	CC	GO:0005886	Plasma membrane
tatC	VC_0088	CC	GO:0005887	Integral component of plasma membrane
tatC	VC_0088	CC	GO:0016020	Membrane
tatC	VC_0088	CC	GO:0016021	Integral component of membrane
tatC	VC_0088	CC	GO:0031224	Intrinsic component of membrane
tatC	VC_0088	CC	GO:0031226	Intrinsic component of plasma membrane
tatC	VC_0088	CC	GO:0032991	Protein-containing complex
tatC	VC_0088	CC	GO:0033281	TAT protein transport complex
tatC	VC_0088	CC	GO:0071944	Cell periphery
tatC	VC_0088	CC	GO:0098796	Membrane protein complex
tatC	VC_0088	CC	GO:0098797	Plasma membrane protein complex
tatC	VC_0088	CC	GO:0110165	Cellular anatomical entity
tufA	VC_0321	CC	GO:0005622	Intracellular anatomical structure
tufA	VC_0321	CC	GO:0005737	Cytoplasm
tufA	VC_0321	CC	GO:0110165	Cellular anatomical entity
tufA	VC_0321	CC	GOCC:0005622	Intracellular
tufB	VC_0362	CC	GO:0005622	Intracellular anatomical structure
tufB	VC_0362	CC	GO:0005737	Cytoplasm
tufB	VC_0362	CC	GO:0110165	Cellular anatomical entity
tufB	VC_0362	CC	GOCC:0005622	Intracellular
VC_0016	VC_0016	CC	GOCC:0005622	Intracellular
VC_0016	VC_0016	CC	GOCC:0005737	Cytoplasm
VC_0016	VC_0016	CC	GOCC:0005829	Cytosol
VC_0016	VC_0016	CC	GOCC:0110165	Cellular anatomical entity
VC_0175	VC_0175	CC	GOCC:0000922	Spindle pole
VC_0175	VC_0175	CC	GOCC:0005622	Intracellular
VC_0175	VC_0175	CC	GOCC:0005819	Spindle
VC_0175	VC_0175	CC	GOCC:0005856	Cytoskeleton
VC_0175	VC_0175	CC	GOCC:0015630	Microtubule cytoskeleton
VC_0175	VC_0175	CC	GOCC:0043226	Organelle
VC_0175	VC_0175	CC	GOCC:0043228	Non-membrane-bounded organelle
VC_0175	VC_0175	CC	GOCC:0043229	Intracellular organelle
VC_0175	VC_0175	CC	GOCC:0043232	Intracellular non-membrane-bounded organelle
VC_0175	VC_0175	CC	GOCC:0110165	Cellular anatomical entity
VC_0396	VC_0396	CC	GOCC:0110165	Cellular anatomical entity
VC_0783	VC_0783	CC	GO:0030288	Outer membrane-bounded periplasmic space
VC_0783	VC_0783	CC	GO:0030313	Cell envelope
VC_0783	VC_0783	CC	GO:0031975	Envelope
VC_0783	VC_0783	CC	GO:0042597	Periplasmic space
VC_0783	VC_0783	CC	GO:0110165	Cellular anatomical entity
VC_0876	VC_0876	CC	GOCC:0110165	Cellular anatomical entity
VC_0937	VC_0937	CC	GO:0005886	Plasma membrane
VC_0937	VC_0937	CC	GO:0016020	Membrane
VC_0937	VC_0937	CC	GO:0016021	Integral component of membrane
VC_0937	VC_0937	CC	GO:0031224	Intrinsic component of membrane
VC_0937	VC_0937	CC	GO:0071944	Cell periphery
VC_0937	VC_0937	CC	GO:0110165	Cellular anatomical entity
VC_1091	VC_1091	CC	GO:0005886	Plasma membrane
VC_1091	VC_1091	CC	GO:0016020	Membrane
VC_1091	VC_1091	CC	GO:0016021	Integral component of membrane
VC_1091	VC_1091	CC	GO:0030288	Outer membrane-bounded periplasmic space
VC_1091	VC_1091	CC	GO:0030313	Cell envelope
VC_1091	VC_1091	CC	GO:0031224	Intrinsic component of membrane
VC_1091	VC_1091	CC	GO:0031975	Envelope
VC_1091	VC_1091	CC	GO:0032991	Protein-containing complex
VC_1091	VC_1091	CC	GO:0042597	Periplasmic space
VC_1091	VC_1091	CC	GO:0043190	ATP-binding cassette (ABC) transporter complex
VC_1091	VC_1091	CC	GO:0071944	Cell periphery
VC_1091	VC_1091	CC	GO:0098533	ATPase dependent transmembrane transport complex
VC_1091	VC_1091	CC	GO:0098796	Membrane protein complex
VC_1091	VC_1091	CC	GO:0098797	Plasma membrane protein complex
VC_1091	VC_1091	CC	GO:0110165	Cellular anatomical entity
VC_1091	VC_1091	CC	GO:1902495	Transmembrane transporter complex
VC_1091	VC_1091	CC	GO:1990351	Transporter complex
VC_1290	VC_1290	CC	GO:0005622	Intracellular anatomical structure
VC_1290	VC_1290	CC	GO:0005737	Cytoplasm
VC_1290	VC_1290	CC	GO:0005829	Cytosol
VC_1290	VC_1290	CC	GO:0110165	Cellular anatomical entity
VC_1290	VC_1290	CC	GOCC:0005622	Intracellular
VC_1290	VC_1290	CC	GOCC:0032991	Protein-containing complex
VC_1290	VC_1290	CC	GOCC:1902494	Catalytic complex
VC_1448	VC_1448	CC	GO:0016020	Membrane
VC_1448	VC_1448	CC	GO:0016021	Integral component of membrane
VC_1448	VC_1448	CC	GO:0030256	Type I protein secretion system complex
VC_1448	VC_1448	CC	GO:0031224	Intrinsic component of membrane
VC_1448	VC_1448	CC	GO:0032991	Protein-containing complex
VC_1448	VC_1448	CC	GO:0110165	Cellular anatomical entity
VC_1494	VC_1494	CC	GOCC:0005886	Plasma membrane
VC_1494	VC_1494	CC	GOCC:0016020	Membrane
VC_1494	VC_1494	CC	GOCC:0071944	Cell periphery
VC_1494	VC_1494	CC	GOCC:0110165	Cellular anatomical entity
VC_1703	VC_1703	CC	GOCC:0009279	Cell outer membrane
VC_1703	VC_1703	CC	GOCC:0016020	Membrane
VC_1703	VC_1703	CC	GOCC:0019867	Outer membrane
VC_1703	VC_1703	CC	GOCC:0030312	External encapsulating structure
VC_1703	VC_1703	CC	GOCC:0030313	Cell envelope
VC_1703	VC_1703	CC	GOCC:0031975	Envelope
VC_1703	VC_1703	CC	GOCC:0071944	Cell periphery
VC_1703	VC_1703	CC	GOCC:0110165	Cellular anatomical entity
VC_1909	VC_1909	CC	GO:0016020	Membrane
VC_1909	VC_1909	CC	GO:0016021	Integral component of membrane
VC_1909	VC_1909	CC	GO:0031224	Intrinsic component of membrane
VC_1909	VC_1909	CC	GO:0110165	Cellular anatomical entity
VC_1944	VC_1944	CC	GOCC:0005622	Intracellular
VC_1944	VC_1944	CC	GOCC:0005737	Cytoplasm
VC_1944	VC_1944	CC	GOCC:0110165	Cellular anatomical entity
VC_1967	VC_1967	CC	GO:0016020	Membrane
VC_1967	VC_1967	CC	GO:0016021	Integral component of membrane
VC_1967	VC_1967	CC	GO:0031224	Intrinsic component of membrane
VC_1967	VC_1967	CC	GO:0110165	Cellular anatomical entity
VC_1967	VC_1967	CC	GOCC:0005886	Plasma membrane
VC_1967	VC_1967	CC	GOCC:0071944	Cell periphery
VC_2285	VC_2285	CC	GO:0005886	Plasma membrane
VC_2285	VC_2285	CC	GO:0016020	Membrane
VC_2285	VC_2285	CC	GO:0016021	Integral component of membrane
VC_2285	VC_2285	CC	GO:0031224	Intrinsic component of membrane
VC_2285	VC_2285	CC	GO:0071944	Cell periphery
VC_2285	VC_2285	CC	GO:0110165	Cellular anatomical entity
VC_2534	VC_2534	CC	GO:0005886	Plasma membrane
VC_2534	VC_2534	CC	GO:0016020	Membrane
VC_2534	VC_2534	CC	GO:0016021	Integral component of membrane
VC_2534	VC_2534	CC	GO:0031224	Intrinsic component of membrane
VC_2534	VC_2534	CC	GO:0071944	Cell periphery
VC_2534	VC_2534	CC	GO:0110165	Cellular anatomical entity
VC_2534	VC_2534	CC	GOCC:0005622	Intracellular
VC_2534	VC_2534	CC	GOCC:0005737	Cytoplasm
VC_2534	VC_2534	CC	GOCC:0030076	Light-harvesting complex
VC_2534	VC_2534	CC	GOCC:0030077	Plasma membrane light-harvesting complex
VC_2534	VC_2534	CC	GOCC:0031410	Cytoplasmic vesicle
VC_2534	VC_2534	CC	GOCC:0031982	Vesicle
VC_2534	VC_2534	CC	GOCC:0032991	Protein-containing complex
VC_2534	VC_2534	CC	GOCC:0042716	Plasma membrane-derived chromatophore
VC_2534	VC_2534	CC	GOCC:0043226	Organelle
VC_2534	VC_2534	CC	GOCC:0043227	Membrane-bounded organelle
VC_2534	VC_2534	CC	GOCC:0043229	Intracellular organelle
VC_2534	VC_2534	CC	GOCC:0043231	Intracellular membrane-bounded organelle
VC_2534	VC_2534	CC	GOCC:0097708	Intracellular vesicle
VC_2561	VC_2561	CC	GOCC:0005576	Extracellular region
VC_2561	VC_2561	CC	GOCC:0005615	Extracellular space
VC_2561	VC_2561	CC	GOCC:0110165	Cellular anatomical entity
VC_2699	VC_2699	CC	GO:0005886	Plasma membrane
VC_2699	VC_2699	CC	GO:0016020	Membrane
VC_2699	VC_2699	CC	GO:0016021	Integral component of membrane
VC_2699	VC_2699	CC	GO:0031224	Intrinsic component of membrane
VC_2699	VC_2699	CC	GO:0071944	Cell periphery
VC_2699	VC_2699	CC	GO:0110165	Cellular anatomical entity
VC_A0283	VC_A0283	CC	GO:0005622	Intracellular anatomical structure
VC_A0283	VC_A0283	CC	GO:0005856	Cytoskeleton
VC_A0283	VC_A0283	CC	GO:0005875	Microtubule associated complex
VC_A0283	VC_A0283	CC	GO:0015630	Microtubule cytoskeleton
VC_A0283	VC_A0283	CC	GO:0030286	Dynein complex
VC_A0283	VC_A0283	CC	GO:0032991	Protein-containing complex
VC_A0283	VC_A0283	CC	GO:0043226	Organelle
VC_A0283	VC_A0283	CC	GO:0043228	Non-membrane-bounded organelle
VC_A0283	VC_A0283	CC	GO:0043229	Intracellular organelle
VC_A0283	VC_A0283	CC	GO:0043232	Intracellular non-membrane-bounded organelle
VC_A0283	VC_A0283	CC	GO:0110165	Cellular anatomical entity
VC_A0283	VC_A0283	CC	GO:1902494	Catalytic complex
VC_A0283	VC_A0283	CC	GOCC:0005622	Intracellular
VC_A0328	VC_A0328	CC	GOCC:0005622	Intracellular
VC_A0328	VC_A0328	CC	GOCC:0005737	Cytoplasm
VC_A0328	VC_A0328	CC	GOCC:0005829	Cytosol
VC_A0328	VC_A0328	CC	GOCC:0110165	Cellular anatomical entity
VC_A0341	VC_A0341	CC	GOCC:0005622	Intracellular
VC_A0341	VC_A0341	CC	GOCC:0005737	Cytoplasm
VC_A0341	VC_A0341	CC	GOCC:0005829	Cytosol
VC_A0341	VC_A0341	CC	GOCC:0110165	Cellular anatomical entity
VC_A0347	VC_A0347	CC	GOCC:0005622	Intracellular
VC_A0347	VC_A0347	CC	GOCC:0005737	Cytoplasm
VC_A0347	VC_A0347	CC	GOCC:0005829	Cytosol
VC_A0347	VC_A0347	CC	GOCC:0110165	Cellular anatomical entity
VC_A0376	VC_A0376	CC	GO:0016020	Membrane
VC_A0376	VC_A0376	CC	GO:0016021	Integral component of membrane
VC_A0376	VC_A0376	CC	GO:0031224	Intrinsic component of membrane
VC_A0376	VC_A0376	CC	GO:0110165	Cellular anatomical entity
VC_A0379	VC_A0379	CC	GO:0016020	Membrane
VC_A0379	VC_A0379	CC	GO:0016021	Integral component of membrane
VC_A0379	VC_A0379	CC	GO:0031224	Intrinsic component of membrane
VC_A0379	VC_A0379	CC	GO:0110165	Cellular anatomical entity
VC_A0382	VC_A0382	CC	GOCC:0005622	Intracellular
VC_A0382	VC_A0382	CC	GOCC:0110165	Cellular anatomical entity
VC_A0401	VC_A0401	CC	GOCC:0005622	Intracellular
VC_A0401	VC_A0401	CC	GOCC:0005737	Cytoplasm
VC_A0401	VC_A0401	CC	GOCC:0005829	Cytosol
VC_A0401	VC_A0401	CC	GOCC:0110165	Cellular anatomical entity
VC_A0442	VC_A0442	CC	GOCC:0005622	Intracellular
VC_A0442	VC_A0442	CC	GOCC:0005737	Cytoplasm
VC_A0442	VC_A0442	CC	GOCC:0110165	Cellular anatomical entity
VC_A0463	VC_A0463	CC	GOCC:0005622	Intracellular
VC_A0463	VC_A0463	CC	GOCC:0005737	Cytoplasm
VC_A0463	VC_A0463	CC	GOCC:0005829	Cytosol
VC_A0463	VC_A0463	CC	GOCC:0110165	Cellular anatomical entity
VC_A0465	VC_A0465	CC	GO:0016020	Membrane
VC_A0465	VC_A0465	CC	GO:0016021	Integral component of membrane
VC_A0465	VC_A0465	CC	GO:0031224	Intrinsic component of membrane
VC_A0465	VC_A0465	CC	GO:0110165	Cellular anatomical entity
VC_A0474	VC_A0474	CC	GOCC:0005622	Intracellular
VC_A0474	VC_A0474	CC	GOCC:0005737	Cytoplasm
VC_A0474	VC_A0474	CC	GOCC:0110165	Cellular anatomical entity
VC_A0506	VC_A0506	CC	GOCC:0005622	Intracellular
VC_A0506	VC_A0506	CC	GOCC:0005737	Cytoplasm
VC_A0506	VC_A0506	CC	GOCC:0005829	Cytosol
VC_A0506	VC_A0506	CC	GOCC:0110165	Cellular anatomical entity
VC_A0781	VC_A0781	CC	GO:0005886	Plasma membrane
VC_A0781	VC_A0781	CC	GO:0016020	Membrane
VC_A0781	VC_A0781	CC	GO:0016021	Integral component of membrane
VC_A0781	VC_A0781	CC	GO:0031224	Intrinsic component of membrane
VC_A0781	VC_A0781	CC	GO:0071944	Cell periphery
VC_A0781	VC_A0781	CC	GO:0110165	Cellular anatomical entity
VC_A0788	VC_A0788	CC	GOCC:0110165	Cellular anatomical entity
add	VC_2751	KEGG	map00230	Purine metabolism
add	VC_2751	KEGG	map01100	Metabolic pathways
dapF	VC_0126	KEGG	map00300	Lysine biosynthesis
dapF	VC_0126	KEGG	map01100	Metabolic pathways
dapF	VC_0126	KEGG	map01110	Biosynthesis of secondary metabolites
dapF	VC_0126	KEGG	map01120	Microbial metabolism in diverse environments
dapF	VC_0126	KEGG	map01230	Biosynthesis of amino acids
fabH1	VC_2023	KEGG	map00061	Fatty acid biosynthesis
fabH1	VC_2023	KEGG	map01100	Metabolic pathways
fabH1	VC_2023	KEGG	map01212	Fatty acid metabolism
fabV	VC_1738	KEGG	map00061	Fatty acid biosynthesis
fabV	VC_1738	KEGG	map00650	Butanoate metabolism
fabV	VC_1738	KEGG	map01100	Metabolic pathways
fabV	VC_1738	KEGG	map01110	Biosynthesis of secondary metabolites
fabV	VC_1738	KEGG	map01120	Microbial metabolism in diverse environments
fabV	VC_1738	KEGG	map01200	Carbon metabolism
fabV	VC_1738	KEGG	map01212	Fatty acid metabolism
folD	VC_1942	KEGG	map00670	One carbon pool by folate
folD	VC_1942	KEGG	map01100	Metabolic pathways
folD	VC_1942	KEGG	map01120	Microbial metabolism in diverse environments
folD	VC_1942	KEGG	map01200	Carbon metabolism
gshB	VC_0468	KEGG	map00270	Cysteine and methionine metabolism
gshB	VC_0468	KEGG	map00480	Glutathione metabolism
gshB	VC_0468	KEGG	map01100	Metabolic pathways
lpoA	VC_0581	KEGG	map00790	Folate biosynthesis
lpoA	VC_0581	KEGG	map01100	Metabolic pathways
pckA	VC_2738	KEGG	map00010	Glycolysis / Gluconeogenesis
pckA	VC_2738	KEGG	map00020	Citrate cycle (TCA cycle)
pckA	VC_2738	KEGG	map00620	Pyruvate metabolism
pckA	VC_2738	KEGG	map01100	Metabolic pathways
pckA	VC_2738	KEGG	map01110	Biosynthesis of secondary metabolites
pckA	VC_2738	KEGG	map01120	Microbial metabolism in diverse environments
pckA	VC_2738	KEGG	map01200	Carbon metabolism
rpmE2	VC_0878	KEGG	map03010	Ribosome
rpoS	VC_0534	KEGG	map05111	Biofilm formation - Vibrio cholerae
tatB	VC_0087	KEGG	map03060	Protein export
tatB	VC_0087	KEGG	map03070	Bacterial secretion system
tatC	VC_0088	KEGG	map03060	Protein export
tatC	VC_0088	KEGG	map03070	Bacterial secretion system
tcpB	VC_0829	KEGG	map05110	Vibrio cholerae infection
tufA	VC_0321	KEGG	map04626	Plant-pathogen interaction
tufB	VC_0362	KEGG	map04626	Plant-pathogen interaction
VC_0175	VC_0175	KEGG	map00240	Pyrimidine metabolism
VC_0175	VC_0175	KEGG	map01100	Metabolic pathways
VC_0396	VC_0396	KEGG	map02020	Two-component system
VC_0870	VC_0870	KEGG	map00130	Ubiquinone and other terpenoid-quinone biosynthesis
VC_0870	VC_0870	KEGG	map01053	Biosynthesis of siderophore group nonribosomal peptides
VC_0870	VC_0870	KEGG	map01100	Metabolic pathways
VC_0870	VC_0870	KEGG	map01110	Biosynthesis of secondary metabolites
VC_0876	VC_0876	KEGG	map01100	Metabolic pathways
VC_0876	VC_0876	KEGG	map01120	Microbial metabolism in diverse environments
VC_0937	VC_0937	KEGG	map02020	Two-component system
VC_1091	VC_1091	KEGG	map01501	beta-Lactam resistance
VC_1091	VC_1091	KEGG	map02010	ABC transporters
VC_1091	VC_1091	KEGG	map02024	Quorum sensing
VC_1290	VC_1290	KEGG	map03030	DNA replication
VC_1290	VC_1290	KEGG	map03430	Mismatch repair
VC_1290	VC_1290	KEGG	map03440	Homologous recombination
VC_1415	VC_1415	KEGG	map03070	Bacterial secretion system
VC_1448	VC_1448	KEGG	map02020	Two-component system
VC_1469	VC_1469	KEGG	map00040	Pentose and glucuronate interconversions
VC_1469	VC_1469	KEGG	map00053	Ascorbate and aldarate metabolism
VC_1469	VC_1469	KEGG	map01100	Metabolic pathways
VC_1469	VC_1469	KEGG	map01120	Microbial metabolism in diverse environments
VC_1494	VC_1494	KEGG	map00480	Glutathione metabolism
VC_1494	VC_1494	KEGG	map01100	Metabolic pathways
VC_1944	VC_1944	KEGG	map00430	Taurine and hypotaurine metabolism
VC_1944	VC_1944	KEGG	map00920	Sulfur metabolism
VC_1967	VC_1967	KEGG	map02020	Two-component system
VC_1967	VC_1967	KEGG	map02030	Bacterial chemotaxis
VC_2534	VC_2534	KEGG	map00230	Purine metabolism
VC_2534	VC_2534	KEGG	map01100	Metabolic pathways
VC_2534	VC_2534	KEGG	map01110	Biosynthesis of secondary metabolites
VC_2561	VC_2561	KEGG	map00860	Porphyrin and chlorophyll metabolism
VC_2561	VC_2561	KEGG	map01100	Metabolic pathways
VC_2561	VC_2561	KEGG	map01110	Biosynthesis of secondary metabolites
VC_2561	VC_2561	KEGG	map01120	Microbial metabolism in diverse environments
VC_2699	VC_2699	KEGG	map02020	Two-component system
VC_A0254	VC_A0254	KEGG	map02020	Two-component system
VC_A0328	VC_A0328	KEGG	map01100	Metabolic pathways
VC_A0341	VC_A0341	KEGG	map01100	Metabolic pathways
VC_A0347	VC_A0347	KEGG	map00620	Pyruvate metabolism
VC_A0347	VC_A0347	KEGG	map01100	Metabolic pathways
VC_A0382	VC_A0382	KEGG	map01100	Metabolic pathways
VC_A0401	VC_A0401	KEGG	map00620	Pyruvate metabolism
VC_A0401	VC_A0401	KEGG	map01100	Metabolic pathways
VC_A0442	VC_A0442	KEGG	map00360	Phenylalanine metabolism
VC_A0442	VC_A0442	KEGG	map01100	Metabolic pathways
VC_A0463	VC_A0463	KEGG	map01100	Metabolic pathways
VC_A0474	VC_A0474	KEGG	map01100	Metabolic pathways
VC_A0506	VC_A0506	KEGG	map00620	Pyruvate metabolism
VC_A0506	VC_A0506	KEGG	map01100	Metabolic pathways
VC_A0781	VC_A0781	KEGG	map02010	ABC transporters
VC_A0781	VC_A0781	KEGG	map02020	Two-component system
add	VC_2751	MF	GO:0003824	Catalytic activity
add	VC_2751	MF	GO:0004000	Adenosine deaminase activity
add	VC_2751	MF	GO:0005488	Binding
add	VC_2751	MF	GO:0008270	Zinc ion binding
add	VC_2751	MF	GO:0016787	Hydrolase activity
add	VC_2751	MF	GO:0016810	Hydrolase activity, acting on carbon-nitrogen (but not peptide) bonds
add	VC_2751	MF	GO:0016814	Hydrolase activity, acting on carbon-nitrogen (but not peptide) bonds, in cyclic amidines
add	VC_2751	MF	GO:0019239	Deaminase activity
add	VC_2751	MF	GO:0043167	Ion binding
add	VC_2751	MF	GO:0043169	Cation binding
add	VC_2751	MF	GO:0046872	Metal ion binding
add	VC_2751	MF	GO:0046914	Transition metal ion binding
add	VC_2751	MF	GO:0046936	2-deoxyadenosine deaminase activity
blc	VC_A0317	MF	GO:0005488	Binding
blc	VC_A0317	MF	GO:0008289	Lipid binding
clpS	VC_1143	MF	GO:0005488	Binding
clpS	VC_1143	MF	GO:0005515	Protein binding
clpS	VC_1143	MF	GO:0051087	Chaperone binding
dapF	VC_0126	MF	GO:0003824	Catalytic activity
dapF	VC_0126	MF	GO:0008837	Diaminopimelate epimerase activity
dapF	VC_0126	MF	GO:0016853	Isomerase activity
dapF	VC_0126	MF	GO:0016854	Racemase and epimerase activity
dapF	VC_0126	MF	GO:0016855	Racemase and epimerase activity, acting on amino acids and derivatives
dapF	VC_0126	MF	GO:0036361	Racemase activity, acting on amino acids and derivatives
dapF	VC_0126	MF	GO:0047661	Amino-acid racemase activity
fabH1	VC_2023	MF	GO:0003824	Catalytic activity
fabH1	VC_2023	MF	GO:0004312	Fatty acid synthase activity
fabH1	VC_2023	MF	GO:0004315	3-oxoacyl-[acyl-carrier-protein] synthase activity
fabH1	VC_2023	MF	GO:0016740	Transferase activity
fabH1	VC_2023	MF	GO:0016746	Acyltransferase activity
fabH1	VC_2023	MF	GO:0016747	Acyltransferase activity, transferring groups other than amino-acyl groups
fabH1	VC_2023	MF	GO:0033818	Beta-ketoacyl-acyl-carrier-protein synthase III activity
fabV	VC_1738	MF	GO:0000166	Nucleotide binding
fabV	VC_1738	MF	GO:0003824	Catalytic activity
fabV	VC_1738	MF	GO:0004312	Fatty acid synthase activity
fabV	VC_1738	MF	GO:0004318	Enoyl-[acyl-carrier-protein] reductase (NADH) activity
fabV	VC_1738	MF	GO:0005488	Binding
fabV	VC_1738	MF	GO:0016491	Oxidoreductase activity
fabV	VC_1738	MF	GO:0016627	Oxidoreductase activity, acting on the CH-CH group of donors
fabV	VC_1738	MF	GO:0016628	Oxidoreductase activity, acting on the CH-CH group of donors, NAD or NADP as acceptor
fabV	VC_1738	MF	GO:0016631	Enoyl-[acyl-carrier-protein] reductase activity
fabV	VC_1738	MF	GO:0016740	Transferase activity
fabV	VC_1738	MF	GO:0016746	Acyltransferase activity
fabV	VC_1738	MF	GO:0016747	Acyltransferase activity, transferring groups other than amino-acyl groups
fabV	VC_1738	MF	GO:0036094	Small molecule binding
fabV	VC_1738	MF	GO:0050343	trans-2-enoyl-CoA reductase (NAD+) activity
fabV	VC_1738	MF	GO:0051287	NAD binding
fabV	VC_1738	MF	GO:0097159	Organic cyclic compound binding
fabV	VC_1738	MF	GO:1901265	Nucleoside phosphate binding
fabV	VC_1738	MF	GO:1901363	Heterocyclic compound binding
folD	VC_1942	MF	GO:0003824	Catalytic activity
folD	VC_1942	MF	GO:0004477	Methenyltetrahydrofolate cyclohydrolase activity
folD	VC_1942	MF	GO:0004486	Methylenetetrahydrofolate dehydrogenase [NAD(P)+] activity
folD	VC_1942	MF	GO:0004488	Methylenetetrahydrofolate dehydrogenase (NADP+) activity
folD	VC_1942	MF	GO:0016491	Oxidoreductase activity
folD	VC_1942	MF	GO:0016645	Oxidoreductase activity, acting on the CH-NH group of donors
folD	VC_1942	MF	GO:0016646	Oxidoreductase activity, acting on the CH-NH group of donors, NAD or NADP as acceptor
folD	VC_1942	MF	GO:0016787	Hydrolase activity
folD	VC_1942	MF	GO:0016810	Hydrolase activity, acting on carbon-nitrogen (but not peptide) bonds
folD	VC_1942	MF	GO:0016814	Hydrolase activity, acting on carbon-nitrogen (but not peptide) bonds, in cyclic amidines
folD	VC_1942	MF	GO:0019238	Cyclohydrolase activity
gshB	VC_0468	MF	GO:0000166	Nucleotide binding
gshB	VC_0468	MF	GO:0003824	Catalytic activity
gshB	VC_0468	MF	GO:0004363	Glutathione synthase activity
gshB	VC_0468	MF	GO:0005488	Binding
gshB	VC_0468	MF	GO:0005524	ATP binding
gshB	VC_0468	MF	GO:0016874	Ligase activity
gshB	VC_0468	MF	GO:0016879	Ligase activity, forming carbon-nitrogen bonds
gshB	VC_0468	MF	GO:0016881	Acid-amino acid ligase activity
gshB	VC_0468	MF	GO:0017076	Purine nucleotide binding
gshB	VC_0468	MF	GO:0030554	Adenyl nucleotide binding
gshB	VC_0468	MF	GO:0032553	Ribonucleotide binding
gshB	VC_0468	MF	GO:0032555	Purine ribonucleotide binding
gshB	VC_0468	MF	GO:0032559	Adenyl ribonucleotide binding
gshB	VC_0468	MF	GO:0035639	Purine ribonucleoside triphosphate binding
gshB	VC_0468	MF	GO:0036094	Small molecule binding
gshB	VC_0468	MF	GO:0043167	Ion binding
gshB	VC_0468	MF	GO:0043168	Anion binding
gshB	VC_0468	MF	GO:0043169	Cation binding
gshB	VC_0468	MF	GO:0046872	Metal ion binding
gshB	VC_0468	MF	GO:0097159	Organic cyclic compound binding
gshB	VC_0468	MF	GO:0097367	Carbohydrate derivative binding
gshB	VC_0468	MF	GO:1901265	Nucleoside phosphate binding
gshB	VC_0468	MF	GO:1901363	Heterocyclic compound binding
lpoA	VC_0581	MF	GO:0030234	Enzyme regulator activity
lpoA	VC_0581	MF	GO:0098772	Molecular function regulator activity
padC	VC_2240	MF	GO:0003824	Catalytic activity
padC	VC_2240	MF	GO:0016829	Lyase activity
padC	VC_2240	MF	GO:0016830	Carbon-carbon lyase activity
padC	VC_2240	MF	GO:0016831	Carboxy-lyase activity
pckA	VC_2738	MF	GO:0000166	Nucleotide binding
pckA	VC_2738	MF	GO:0003824	Catalytic activity
pckA	VC_2738	MF	GO:0004611	Phosphoenolpyruvate carboxykinase activity
pckA	VC_2738	MF	GO:0004612	Phosphoenolpyruvate carboxykinase (ATP) activity
pckA	VC_2738	MF	GO:0005488	Binding
pckA	VC_2738	MF	GO:0005524	ATP binding
pckA	VC_2738	MF	GO:0016829	Lyase activity
pckA	VC_2738	MF	GO:0016830	Carbon-carbon lyase activity
pckA	VC_2738	MF	GO:0016831	Carboxy-lyase activity
pckA	VC_2738	MF	GO:0017076	Purine nucleotide binding
pckA	VC_2738	MF	GO:0030554	Adenyl nucleotide binding
pckA	VC_2738	MF	GO:0032553	Ribonucleotide binding
pckA	VC_2738	MF	GO:0032555	Purine ribonucleotide binding
pckA	VC_2738	MF	GO:0032559	Adenyl ribonucleotide binding
pckA	VC_2738	MF	GO:0035639	Purine ribonucleoside triphosphate binding
pckA	VC_2738	MF	GO:0036094	Small molecule binding
pckA	VC_2738	MF	GO:0043167	Ion binding
pckA	VC_2738	MF	GO:0043168	Anion binding
pckA	VC_2738	MF	GO:0043169	Cation binding
pckA	VC_2738	MF	GO:0046872	Metal ion binding
pckA	VC_2738	MF	GO:0097159	Organic cyclic compound binding
pckA	VC_2738	MF	GO:0097367	Carbohydrate derivative binding
pckA	VC_2738	MF	GO:1901265	Nucleoside phosphate binding
pckA	VC_2738	MF	GO:1901363	Heterocyclic compound binding
rpmE2	VC_0878	MF	GO:0003735	Structural constituent of ribosome
rpmE2	VC_0878	MF	GO:0005198	Structural molecule activity
rpoS	VC_0534	MF	GO:0003676	Nucleic acid binding
rpoS	VC_0534	MF	GO:0003677	DNA binding
rpoS	VC_0534	MF	GO:0003700	DNA-binding transcription factor activity
rpoS	VC_0534	MF	GO:0005488	Binding
rpoS	VC_0534	MF	GO:0016987	Sigma factor activity
rpoS	VC_0534	MF	GO:0097159	Organic cyclic compound binding
rpoS	VC_0534	MF	GO:0140110	Transcription regulator activity
rpoS	VC_0534	MF	GO:1901363	Heterocyclic compound binding
tatB	VC_0087	MF	GO:0005215	Transporter activity
tatB	VC_0087	MF	GO:0008320	Protein transmembrane transporter activity
tatB	VC_0087	MF	GO:0022857	Transmembrane transporter activity
tatB	VC_0087	MF	GO:0022884	Macromolecule transmembrane transporter activity
tatB	VC_0087	MF	GO:0140318	Protein transporter activity
tatC	VC_0088	MF	GO:0005215	Transporter activity
tatC	VC_0088	MF	GO:0008320	Protein transmembrane transporter activity
tatC	VC_0088	MF	GO:0009977	Proton motive force dependent protein transmembrane transporter activity
tatC	VC_0088	MF	GO:0015291	Secondary active transmembrane transporter activity
tatC	VC_0088	MF	GO:0022804	Active transmembrane transporter activity
tatC	VC_0088	MF	GO:0022857	Transmembrane transporter activity
tatC	VC_0088	MF	GO:0022884	Macromolecule transmembrane transporter activity
tatC	VC_0088	MF	GO:0140318	Protein transporter activity
tufA	VC_0321	MF	GO:0000166	Nucleotide binding
tufA	VC_0321	MF	GO:0003676	Nucleic acid binding
tufA	VC_0321	MF	GO:0003746	Translation elongation factor activity
tufA	VC_0321	MF	GO:0003824	Catalytic activity
tufA	VC_0321	MF	GO:0003924	GTPase activity
tufA	VC_0321	MF	GO:0005488	Binding
tufA	VC_0321	MF	GO:0005525	GTP binding
tufA	VC_0321	MF	GO:0008135	Translation factor activity, RNA binding
tufA	VC_0321	MF	GO:0016462	Pyrophosphatase activity
tufA	VC_0321	MF	GO:0016787	Hydrolase activity
tufA	VC_0321	MF	GO:0016817	Hydrolase activity, acting on acid anhydrides
tufA	VC_0321	MF	GO:0016818	Hydrolase activity, acting on acid anhydrides, in phosphorus-containing anhydrides
tufA	VC_0321	MF	GO:0017076	Purine nucleotide binding
tufA	VC_0321	MF	GO:0017111	Nucleoside-triphosphatase activity
tufA	VC_0321	MF	GO:0019001	Guanyl nucleotide binding
tufA	VC_0321	MF	GO:0032553	Ribonucleotide binding
tufA	VC_0321	MF	GO:0032555	Purine ribonucleotide binding
tufA	VC_0321	MF	GO:0032561	Guanyl ribonucleotide binding
tufA	VC_0321	MF	GO:0035639	Purine ribonucleoside triphosphate binding
tufA	VC_0321	MF	GO:0036094	Small molecule binding
tufA	VC_0321	MF	GO:0043167	Ion binding
tufA	VC_0321	MF	GO:0043168	Anion binding
tufA	VC_0321	MF	GO:0045182	Translation regulator activity
tufA	VC_0321	MF	GO:0090079	Translation regulator activity, nucleic acid binding
tufA	VC_0321	MF	GO:0097159	Organic cyclic compound binding
tufA	VC_0321	MF	GO:0097367	Carbohydrate derivative binding
tufA	VC_0321	MF	GO:1901265	Nucleoside phosphate binding
tufA	VC_0321	MF	GO:1901363	Heterocyclic compound binding
tufB	VC_0362	MF	GO:0000166	Nucleotide binding
tufB	VC_0362	MF	GO:0003676	Nucleic acid binding
tufB	VC_0362	MF	GO:0003746	Translation elongation factor activity
tufB	VC_0362	MF	GO:0003824	Catalytic activity
tufB	VC_0362	MF	GO:0003924	GTPase activity
tufB	VC_0362	MF	GO:0005488	Binding
tufB	VC_0362	MF	GO:0005525	GTP binding
tufB	VC_0362	MF	GO:0008135	Translation factor activity, RNA binding
tufB	VC_0362	MF	GO:0016462	Pyrophosphatase activity
tufB	VC_0362	MF	GO:0016787	Hydrolase activity
tufB	VC_0362	MF	GO:0016817	Hydrolase activity, acting on acid anhydrides
tufB	VC_0362	MF	GO:0016818	Hydrolase activity, acting on acid anhydrides, in phosphorus-containing anhydrides
tufB	VC_0362	MF	GO:0017076	Purine nucleotide binding
tufB	VC_0362	MF	GO:0017111	Nucleoside-triphosphatase activity
tufB	VC_0362	MF	GO:0019001	Guanyl nucleotide binding
tufB	VC_0362	MF	GO:0032553	Ribonucleotide binding
tufB	VC_0362	MF	GO:0032555	Purine ribonucleotide binding
tufB	VC_0362	MF	GO:0032561	Guanyl ribonucleotide binding
tufB	VC_0362	MF	GO:0035639	Purine ribonucleoside triphosphate binding
tufB	VC_0362	MF	GO:0036094	Small molecule binding
tufB	VC_0362	MF	GO:0043167	Ion binding
tufB	VC_0362	MF	GO:0043168	Anion binding
tufB	VC_0362	MF	GO:0045182	Translation regulator activity
tufB	VC_0362	MF	GO:0090079	Translation regulator activity, nucleic acid binding
tufB	VC_0362	MF	GO:0097159	Organic cyclic compound binding
tufB	VC_0362	MF	GO:0097367	Carbohydrate derivative binding
tufB	VC_0362	MF	GO:1901265	Nucleoside phosphate binding
tufB	VC_0362	MF	GO:1901363	Heterocyclic compound binding
VC_0016	VC_0016	MF	GO:0003676	Nucleic acid binding
VC_0016	VC_0016	MF	GO:0003677	DNA binding
VC_0016	VC_0016	MF	GO:0005488	Binding
VC_0016	VC_0016	MF	GO:0097159	Organic cyclic compound binding
VC_0016	VC_0016	MF	GO:1901363	Heterocyclic compound binding
VC_0175	VC_0175	MF	GO:0003824	Catalytic activity
VC_0396	VC_0396	MF	GO:0003676	Nucleic acid binding
VC_0396	VC_0396	MF	GO:0003677	DNA binding
VC_0396	VC_0396	MF	GO:0005488	Binding
VC_0396	VC_0396	MF	GO:0097159	Organic cyclic compound binding
VC_0396	VC_0396	MF	GO:1901363	Heterocyclic compound binding
VC_0783	VC_0783	MF	GO:0003824	Catalytic activity
VC_0783	VC_0783	MF	GO:0005488	Binding
VC_0783	VC_0783	MF	GO:0005515	Protein binding
VC_0783	VC_0783	MF	GO:0008484	Sulfuric ester hydrolase activity
VC_0783	VC_0783	MF	GO:0016787	Hydrolase activity
VC_0783	VC_0783	MF	GO:0016788	Hydrolase activity, acting on ester bonds
VC_0783	VC_0783	MF	GO:0018741	Alkyl sulfatase activity
VC_0783	VC_0783	MF	GO:0046983	Protein dimerization activity
VC_0870	VC_0870	MF	GO:0003676	Nucleic acid binding
VC_0870	VC_0870	MF	GO:0003677	DNA binding
VC_0870	VC_0870	MF	GO:0003824	Catalytic activity
VC_0870	VC_0870	MF	GO:0004803	Transposase activity
VC_0870	VC_0870	MF	GO:0005488	Binding
VC_0870	VC_0870	MF	GO:0097159	Organic cyclic compound binding
VC_0870	VC_0870	MF	GO:0140097	Catalytic activity, acting on DNA
VC_0870	VC_0870	MF	GO:0140640	Catalytic activity, acting on a nucleic acid
VC_0870	VC_0870	MF	GO:1901363	Heterocyclic compound binding
VC_0876	VC_0876	MF	GO:0003824	Catalytic activity
VC_0876	VC_0876	MF	GO:0008168	Methyltransferase activity
VC_0876	VC_0876	MF	GO:0008173	RNA methyltransferase activity
VC_0876	VC_0876	MF	GO:0008175	tRNA methyltransferase activity
VC_0876	VC_0876	MF	GO:0008757	S-adenosylmethionine-dependent methyltransferase activity
VC_0876	VC_0876	MF	GO:0016426	tRNA (adenine) methyltransferase activity
VC_0876	VC_0876	MF	GO:0016740	Transferase activity
VC_0876	VC_0876	MF	GO:0016741	Transferase activity, transferring one-carbon groups
VC_0876	VC_0876	MF	GO:0089715	tRNA m6t6A37 methyltransferase activity
VC_0876	VC_0876	MF	GO:0140098	Catalytic activity, acting on RNA
VC_0876	VC_0876	MF	GO:0140101	Catalytic activity, acting on a tRNA
VC_0876	VC_0876	MF	GO:0140640	Catalytic activity, acting on a nucleic acid
VC_0937	VC_0937	MF	GO:0000166	Nucleotide binding
VC_0937	VC_0937	MF	GO:0003824	Catalytic activity
VC_0937	VC_0937	MF	GO:0004672	Protein kinase activity
VC_0937	VC_0937	MF	GO:0004713	Protein tyrosine kinase activity
VC_0937	VC_0937	MF	GO:0005488	Binding
VC_0937	VC_0937	MF	GO:0005524	ATP binding
VC_0937	VC_0937	MF	GO:0016301	Kinase activity
VC_0937	VC_0937	MF	GO:0016740	Transferase activity
VC_0937	VC_0937	MF	GO:0016772	Transferase activity, transferring phosphorus-containing groups
VC_0937	VC_0937	MF	GO:0016773	Phosphotransferase activity, alcohol group as acceptor
VC_0937	VC_0937	MF	GO:0017076	Purine nucleotide binding
VC_0937	VC_0937	MF	GO:0030554	Adenyl nucleotide binding
VC_0937	VC_0937	MF	GO:0032553	Ribonucleotide binding
VC_0937	VC_0937	MF	GO:0032555	Purine ribonucleotide binding
VC_0937	VC_0937	MF	GO:0032559	Adenyl ribonucleotide binding
VC_0937	VC_0937	MF	GO:0035639	Purine ribonucleoside triphosphate binding
VC_0937	VC_0937	MF	GO:0036094	Small molecule binding
VC_0937	VC_0937	MF	GO:0043167	Ion binding
VC_0937	VC_0937	MF	GO:0043168	Anion binding
VC_0937	VC_0937	MF	GO:0097159	Organic cyclic compound binding
VC_0937	VC_0937	MF	GO:0097367	Carbohydrate derivative binding
VC_0937	VC_0937	MF	GO:0140096	Catalytic activity, acting on a protein
VC_0937	VC_0937	MF	GO:1901265	Nucleoside phosphate binding
VC_0937	VC_0937	MF	GO:1901363	Heterocyclic compound binding
VC_1091	VC_1091	MF	GO:0005215	Transporter activity
VC_1091	VC_1091	MF	GO:0022857	Transmembrane transporter activity
VC_1091	VC_1091	MF	GO:0042887	Amide transmembrane transporter activity
VC_1091	VC_1091	MF	GO:1904680	Peptide transmembrane transporter activity
VC_1290	VC_1290	MF	GO:0003676	Nucleic acid binding
VC_1290	VC_1290	MF	GO:0003824	Catalytic activity
VC_1290	VC_1290	MF	GO:0004518	Nuclease activity
VC_1290	VC_1290	MF	GO:0004527	Exonuclease activity
VC_1290	VC_1290	MF	GO:0005488	Binding
VC_1290	VC_1290	MF	GO:0008408	3-5 exonuclease activity
VC_1290	VC_1290	MF	GO:0016787	Hydrolase activity
VC_1290	VC_1290	MF	GO:0016788	Hydrolase activity, acting on ester bonds
VC_1290	VC_1290	MF	GO:0097159	Organic cyclic compound binding
VC_1290	VC_1290	MF	GO:1901363	Heterocyclic compound binding
VC_1448	VC_1448	MF	GO:0000166	Nucleotide binding
VC_1448	VC_1448	MF	GO:0003824	Catalytic activity
VC_1448	VC_1448	MF	GO:0005215	Transporter activity
VC_1448	VC_1448	MF	GO:0005488	Binding
VC_1448	VC_1448	MF	GO:0005524	ATP binding
VC_1448	VC_1448	MF	GO:0008233	Peptidase activity
VC_1448	VC_1448	MF	GO:0015399	Primary active transmembrane transporter activity
VC_1448	VC_1448	MF	GO:0016787	Hydrolase activity
VC_1448	VC_1448	MF	GO:0017076	Purine nucleotide binding
VC_1448	VC_1448	MF	GO:0022804	Active transmembrane transporter activity
VC_1448	VC_1448	MF	GO:0022857	Transmembrane transporter activity
VC_1448	VC_1448	MF	GO:0030554	Adenyl nucleotide binding
VC_1448	VC_1448	MF	GO:0032553	Ribonucleotide binding
VC_1448	VC_1448	MF	GO:0032555	Purine ribonucleotide binding
VC_1448	VC_1448	MF	GO:0032559	Adenyl ribonucleotide binding
VC_1448	VC_1448	MF	GO:0035639	Purine ribonucleoside triphosphate binding
VC_1448	VC_1448	MF	GO:0036094	Small molecule binding
VC_1448	VC_1448	MF	GO:0042626	ATPase-coupled transmembrane transporter activity
VC_1448	VC_1448	MF	GO:0043167	Ion binding
VC_1448	VC_1448	MF	GO:0043168	Anion binding
VC_1448	VC_1448	MF	GO:0097159	Organic cyclic compound binding
VC_1448	VC_1448	MF	GO:0097367	Carbohydrate derivative binding
VC_1448	VC_1448	MF	GO:0140096	Catalytic activity, acting on a protein
VC_1448	VC_1448	MF	GO:0140359	ABC-type transporter activity
VC_1448	VC_1448	MF	GO:0140657	ATP-dependent activity
VC_1448	VC_1448	MF	GO:1901265	Nucleoside phosphate binding
VC_1448	VC_1448	MF	GO:1901363	Heterocyclic compound binding
VC_1454	VC_1454	MF	GO:0003676	Nucleic acid binding
VC_1454	VC_1454	MF	GO:0003677	DNA binding
VC_1454	VC_1454	MF	GO:0003824	Catalytic activity
VC_1454	VC_1454	MF	GO:0003916	DNA topoisomerase activity
VC_1454	VC_1454	MF	GO:0005488	Binding
VC_1454	VC_1454	MF	GO:0016853	Isomerase activity
VC_1454	VC_1454	MF	GO:0097159	Organic cyclic compound binding
VC_1454	VC_1454	MF	GO:0140097	Catalytic activity, acting on DNA
VC_1454	VC_1454	MF	GO:0140640	Catalytic activity, acting on a nucleic acid
VC_1454	VC_1454	MF	GO:1901363	Heterocyclic compound binding
VC_1494	VC_1494	MF	GO:0003824	Catalytic activity
VC_1494	VC_1494	MF	GO:0004177	Aminopeptidase activity
VC_1494	VC_1494	MF	GO:0005488	Binding
VC_1494	VC_1494	MF	GO:0008233	Peptidase activity
VC_1494	VC_1494	MF	GO:0008237	Metallopeptidase activity
VC_1494	VC_1494	MF	GO:0008238	Exopeptidase activity
VC_1494	VC_1494	MF	GO:0008270	Zinc ion binding
VC_1494	VC_1494	MF	GO:0016787	Hydrolase activity
VC_1494	VC_1494	MF	GO:0043167	Ion binding
VC_1494	VC_1494	MF	GO:0043169	Cation binding
VC_1494	VC_1494	MF	GO:0046872	Metal ion binding
VC_1494	VC_1494	MF	GO:0046914	Transition metal ion binding
VC_1494	VC_1494	MF	GO:0140096	Catalytic activity, acting on a protein
VC_1696	VC_1696	MF	GO:0003676	Nucleic acid binding
VC_1696	VC_1696	MF	GO:0003677	DNA binding
VC_1696	VC_1696	MF	GO:0005488	Binding
VC_1696	VC_1696	MF	GO:0097159	Organic cyclic compound binding
VC_1696	VC_1696	MF	GO:1901363	Heterocyclic compound binding
VC_1703	VC_1703	MF	GO:0005488	Binding
VC_1703	VC_1703	MF	GO:0043167	Ion binding
VC_1703	VC_1703	MF	GO:0043169	Cation binding
VC_1703	VC_1703	MF	GO:0046872	Metal ion binding
VC_1944	VC_1944	MF	GO:0003824	Catalytic activity
VC_1944	VC_1944	MF	GO:0016491	Oxidoreductase activity
VC_2285	VC_2285	MF	GO:0003824	Catalytic activity
VC_2285	VC_2285	MF	GO:0016740	Transferase activity
VC_2285	VC_2285	MF	GO:0016772	Transferase activity, transferring phosphorus-containing groups
VC_2285	VC_2285	MF	GO:0016779	Nucleotidyltransferase activity
VC_2285	VC_2285	MF	GO:0052621	Diguanylate cyclase activity
VC_2344	VC_2344	MF	GO:0000166	Nucleotide binding
VC_2344	VC_2344	MF	GO:0005488	Binding
VC_2344	VC_2344	MF	GO:0017076	Purine nucleotide binding
VC_2344	VC_2344	MF	GO:0019001	Guanyl nucleotide binding
VC_2344	VC_2344	MF	GO:0030551	Cyclic nucleotide binding
VC_2344	VC_2344	MF	GO:0032553	Ribonucleotide binding
VC_2344	VC_2344	MF	GO:0032555	Purine ribonucleotide binding
VC_2344	VC_2344	MF	GO:0032561	Guanyl ribonucleotide binding
VC_2344	VC_2344	MF	GO:0035438	cyclic-di-GMP binding
VC_2344	VC_2344	MF	GO:0036094	Small molecule binding
VC_2344	VC_2344	MF	GO:0043167	Ion binding
VC_2344	VC_2344	MF	GO:0043168	Anion binding
VC_2344	VC_2344	MF	GO:0097159	Organic cyclic compound binding
VC_2344	VC_2344	MF	GO:0097367	Carbohydrate derivative binding
VC_2344	VC_2344	MF	GO:1901265	Nucleoside phosphate binding
VC_2344	VC_2344	MF	GO:1901363	Heterocyclic compound binding
VC_2534	VC_2534	MF	GO:0005215	Transporter activity
VC_2534	VC_2534	MF	GO:0005488	Binding
VC_2534	VC_2534	MF	GO:0008324	Cation transmembrane transporter activity
VC_2534	VC_2534	MF	GO:0015075	Ion transmembrane transporter activity
VC_2534	VC_2534	MF	GO:0015095	Magnesium ion transmembrane transporter activity
VC_2534	VC_2534	MF	GO:0015318	Inorganic molecular entity transmembrane transporter activity
VC_2534	VC_2534	MF	GO:0022857	Transmembrane transporter activity
VC_2534	VC_2534	MF	GO:0022890	Inorganic cation transmembrane transporter activity
VC_2534	VC_2534	MF	GO:0043167	Ion binding
VC_2534	VC_2534	MF	GO:0043169	Cation binding
VC_2534	VC_2534	MF	GO:0046872	Metal ion binding
VC_2534	VC_2534	MF	GO:0046873	Metal ion transmembrane transporter activity
VC_2561	VC_2561	MF	GO:0003824	Catalytic activity
VC_2561	VC_2561	MF	GO:0004851	uroporphyrin-III C-methyltransferase activity
VC_2561	VC_2561	MF	GO:0008168	Methyltransferase activity
VC_2561	VC_2561	MF	GO:0008169	C-methyltransferase activity
VC_2561	VC_2561	MF	GO:0008757	S-adenosylmethionine-dependent methyltransferase activity
VC_2561	VC_2561	MF	GO:0016740	Transferase activity
VC_2561	VC_2561	MF	GO:0016741	Transferase activity, transferring one-carbon groups
VC_2699	VC_2699	MF	GO:0005215	Transporter activity
VC_2699	VC_2699	MF	GO:0008509	Anion transmembrane transporter activity
VC_2699	VC_2699	MF	GO:0008514	Organic anion transmembrane transporter activity
VC_2699	VC_2699	MF	GO:0015075	Ion transmembrane transporter activity
VC_2699	VC_2699	MF	GO:0015556	C4-dicarboxylate transmembrane transporter activity
VC_2699	VC_2699	MF	GO:0022857	Transmembrane transporter activity
VC_A0328	VC_A0328	MF	GO:0003824	Catalytic activity
VC_A0328	VC_A0328	MF	GO:0016491	Oxidoreductase activity
VC_A0328	VC_A0328	MF	GO:0051213	Dioxygenase activity
VC_A0382	VC_A0382	MF	GO:0003824	Catalytic activity
VC_A0382	VC_A0382	MF	GO:0008080	N-acetyltransferase activity
VC_A0382	VC_A0382	MF	GO:0016407	Acetyltransferase activity
VC_A0382	VC_A0382	MF	GO:0016410	N-acyltransferase activity
VC_A0382	VC_A0382	MF	GO:0016740	Transferase activity
VC_A0382	VC_A0382	MF	GO:0016746	Acyltransferase activity
VC_A0382	VC_A0382	MF	GO:0016747	Acyltransferase activity, transferring groups other than amino-acyl groups
VC_A0442	VC_A0442	MF	GO:0003824	Catalytic activity
VC_A0442	VC_A0442	MF	GO:0008080	N-acetyltransferase activity
VC_A0442	VC_A0442	MF	GO:0016407	Acetyltransferase activity
VC_A0442	VC_A0442	MF	GO:0016410	N-acyltransferase activity
VC_A0442	VC_A0442	MF	GO:0016740	Transferase activity
VC_A0442	VC_A0442	MF	GO:0016746	Acyltransferase activity
VC_A0442	VC_A0442	MF	GO:0016747	Acyltransferase activity, transferring groups other than amino-acyl groups
VC_A0474	VC_A0474	MF	GO:0003824	Catalytic activity
VC_A0474	VC_A0474	MF	GO:0008080	N-acetyltransferase activity
VC_A0474	VC_A0474	MF	GO:0016407	Acetyltransferase activity
VC_A0474	VC_A0474	MF	GO:0016410	N-acyltransferase activity
VC_A0474	VC_A0474	MF	GO:0016740	Transferase activity
VC_A0474	VC_A0474	MF	GO:0016746	Acyltransferase activity
VC_A0474	VC_A0474	MF	GO:0016747	Acyltransferase activity, transferring groups other than amino-acyl groups
