# Supplementary material for: Core and accessory genomic traits of Vibrio cholerae O1 drive lineage transmission and disease severity
Source: Nat Commun. 2024 Sep 23;15:8231. doi: 10.1038/s41467-024-52238-0 (PMC11420230; doi:10.1038/s41467-024-52238-0)
Supplement: Supplementary file 23 — Supplementary Data 20 [file 41467_2024_52238_MOESM23_ESM.xlsx]

## Sheet: BP
Gene Enrichment Analysis
Biological Processes (BP)
#term ID	term description	observed gene count	background gene count	strength	false discovery rate	matching proteins in network
GO:0006412	Translation	33	109	0.97	5.9e-18	rpmB,rpmG,tufA,rplK,rplA,rplL,rpsL,rpsG,fusA1,tufB,rpsF,rpsP,rpsI,rpsO,rpmE2,rpmJ2,infA,VC_1915,tsf,rpsB,rpsD,rpsK,rpsM,rpsE,rpsH,rpsN,rpsQ,rplP,rpsC,rpsS,rplD,rplC,rpsJ
GO:0043043	Peptide biosynthetic process	34	116	0.95	5.9e-18	rpmB,rpmG,tufA,rplK,rplA,rplL,rpsL,rpsG,fusA1,tufB,rpsF,gshB,rpsP,rpsI,rpsO,rpmE2,rpmJ2,infA,VC_1915,tsf,rpsB,rpsD,rpsK,rpsM,rpsE,rpsH,rpsN,rpsQ,rplP,rpsC,rpsS,rplD,rplC,rpsJ
GO:0034645	Cellular macromolecule biosynthetic process	38	173	0.83	3.32e-17	rpmB,rpmG,VC_0225,rfbA,tufA,rplK,rplA,rplL,rpsL,rpsG,fusA1,tufB,rpsF,rpsP,rpsI,lpoA,rpsO,rpmE2,rpmJ2,VC_0934,VC_0937,infA,VC_1915,tsf,rpsB,rpsD,rpsK,rpsM,rpsE,rpsH,rpsN,rpsQ,rplP,rpsC,rpsS,rplD,rplC,rpsJ
GO:0009059	Macromolecule biosynthetic process	40	238	0.71	6.54e-15	rpmB,rpmG,VC_0225,rfbA,tufA,rplK,rplA,rplL,rpoB,rpsL,rpsG,fusA1,tufB,rpsF,rpoS,rpsP,rpsI,lpoA,rpsO,rpmE2,rpmJ2,VC_0934,VC_0937,infA,VC_1915,tsf,rpsB,rpsD,rpsK,rpsM,rpsE,rpsH,rpsN,rpsQ,rplP,rpsC,rpsS,rplD,rplC,rpsJ
GO:0019538	Protein metabolic process	40	293	0.62	3.17e-12	hemC,rpmB,rpmG,tufA,rplK,rplA,rplL,rpsL,rpsG,fusA1,tufB,rpsF,rpsP,rpsI,rpsO,rpmE2,rpmJ2,VC_0937,clpS,VC_1144,VC_1448,VC_1494,VC_1653,infA,VC_1915,tsf,rpsB,rpsD,rpsK,rpsM,rpsE,rpsH,rpsN,rpsQ,rplP,rpsC,rpsS,rplD,rplC,rpsJ
GO:0044271	Cellular nitrogen compound biosynthetic process	42	357	0.56	5.57e-11	hemC,rpmB,rpmG,rfbA,tufA,rplK,rplA,rplL,rpoB,rpsL,rpsG,fusA1,tufB,rpsF,gshB,rpoS,rpsP,rpsI,rpsO,rpmE2,rpmJ2,VC_1363,infA,VC_1915,folD,tsf,rpsB,VC_2561,rpsD,rpsK,rpsM,rpsE,rpsH,rpsN,rpsQ,rplP,rpsC,rpsS,rplD,rplC,rpsJ,add
GO:0010467	Gene expression	36	264	0.62	8.27e-11	rpmB,rpmG,tufA,rplK,rplA,rplL,rpoB,rpsL,rpsG,fusA1,tufB,rpsF,rpoS,rpsP,rpsI,rpsO,VC_0876,rpmE2,rpmJ2,infA,VC_1915,tsf,rpsB,rpsD,rpsK,rpsM,rpsE,rpsH,rpsN,rpsQ,rplP,rpsC,rpsS,rplD,rplC,rpsJ
GO:0044260	Cellular macromolecule metabolic process	42	370	0.54	1.4e-10	rpmB,rpmG,VC_0225,rfbA,tufA,rplK,rplA,rplL,rpsL,rpsG,fusA1,tufB,rpsF,rpsP,rpsI,lpoA,rpsO,VC_0870,VC_0876,rpmE2,rpmJ2,VC_0934,VC_0937,VC_1454,VC_1469,infA,VC_1915,tsf,rpsB,rpsD,rpsK,rpsM,rpsE,rpsH,rpsN,rpsQ,rplP,rpsC,rpsS,rplD,rplC,rpsJ
GO:1901576	Organic substance biosynthetic process	53	613	0.42	1.02e-09	hemC,lysA,dapF,rpmB,rpmG,VC_0225,rfbA,tufA,rplK,rplA,rplL,rpoB,rpsL,rpsG,fusA1,tufB,rpsF,gshB,rpoS,rpsP,rpsI,lpoA,rpsO,rpmE2,rpmJ2,VC_0934,VC_0937,VC_1363,infA,fabV,VC_1915,folD,fabF,VC_2022,fabH1,tsf,rpsB,VC_2561,rpsD,rpsK,rpsM,rpsE,rpsH,rpsN,rpsQ,rplP,rpsC,rpsS,rplD,rplC,rpsJ,pckA,add
GO:0044249	Cellular biosynthetic process	52	602	0.42	1.75e-09	hemC,lysA,dapF,rpmB,rpmG,VC_0225,rfbA,tufA,rplK,rplA,rplL,rpoB,rpsL,rpsG,fusA1,tufB,rpsF,gshB,rpoS,rpsP,rpsI,lpoA,rpsO,rpmE2,rpmJ2,VC_0934,VC_0937,VC_1363,infA,fabV,VC_1915,folD,fabF,VC_2022,fabH1,tsf,rpsB,VC_2561,rpsD,rpsK,rpsM,rpsE,rpsH,rpsN,rpsQ,rplP,rpsC,rpsS,rplD,rplC,rpsJ,add
GO:1901566	Organonitrogen compound biosynthetic process	42	421	0.49	5.43e-09	hemC,lysA,dapF,rpmB,rpmG,tufA,rplK,rplA,rplL,rpsL,rpsG,fusA1,tufB,rpsF,gshB,rpsP,rpsI,lpoA,rpsO,rpmE2,rpmJ2,VC_1363,infA,VC_1915,folD,tsf,rpsB,VC_2561,rpsD,rpsK,rpsM,rpsE,rpsH,rpsN,rpsQ,rplP,rpsC,rpsS,rplD,rplC,rpsJ,add
GO:0043170	Macromolecule metabolic process	51	658	0.38	1.15e-07	hemC,rpmB,rpmG,VC_0225,rfbA,tufA,rplK,rplA,rplL,rpoB,rpsL,rpsG,fusA1,tufB,rpsF,rpoS,rpsP,rpsI,lpoA,rpsO,VC_0870,VC_0876,rpmE2,rpmJ2,VC_0934,VC_0937,clpS,VC_1144,VC_1290,VC_1448,VC_1454,VC_1469,VC_1494,VC_1653,infA,VC_1915,tsf,rpsB,rpsD,rpsK,rpsM,rpsE,rpsH,rpsN,rpsQ,rplP,rpsC,rpsS,rplD,rplC,rpsJ
GO:1901564	Organonitrogen compound metabolic process	49	696	0.33	6.22e-06	hemC,lysA,dapF,rpmB,rpmG,tufA,rplK,rplA,rplL,rpsL,rpsG,fusA1,tufB,rpsF,gshB,rpsP,rpsI,lpoA,rpsO,rpmE2,rpmJ2,VC_0937,clpS,VC_1144,VC_1363,VC_1448,VC_1494,VC_1653,infA,VC_1915,folD,tsf,rpsB,VC_2561,rpsD,rpsK,rpsM,rpsE,rpsH,rpsN,rpsQ,rplP,rpsC,rpsS,rplD,rplC,rpsJ,add,fhs
GO:0034641	Cellular nitrogen compound metabolic process	47	664	0.34	1.11e-05	hemC,rpmB,rpmG,rfbA,tufA,rplK,rplA,rplL,rpoB,rpsL,rpsG,fusA1,tufB,rpsF,gshB,rpoS,rpsP,rpsI,rpsO,VC_0870,VC_0876,rpmE2,rpmJ2,VC_1290,VC_1363,VC_1454,VC_1469,infA,VC_1915,folD,tsf,rpsB,VC_2561,rpsD,rpsK,rpsM,rpsE,rpsH,rpsN,rpsQ,rplP,rpsC,rpsS,rplD,rplC,rpsJ,add
GO:0071704	Organic substance metabolic process	66	1228	0.22	0.0002	hemC,lysA,dapF,rpmB,rpmG,VC_0225,rfbA,tufA,rplK,rplA,rplL,rpoB,rpsL,rpsG,fusA1,tufB,rpsF,gshB,rpoS,rpsP,rpsI,lpoA,rpsO,VC_0783,VC_0870,VC_0876,rpmE2,rpmJ2,VC_0934,VC_0937,clpS,VC_1144,VC_1290,VC_1363,VC_1448,VC_1454,VC_1469,VC_1494,VC_1653,infA,fabV,VC_1915,folD,fabF,VC_2022,fabH1,tsf,rpsB,VC_2561,rpsD,rpsK,rpsM,rpsE,rpsH,rpsN,rpsQ,rplP,rpsC,rpsS,rplD,rplC,rpsJ,pckA,add,blc,fhs
GO:0044238	Primary metabolic process	60	1078	0.23	0.00028	hemC,lysA,dapF,rpmB,rpmG,VC_0225,rfbA,tufA,rplK,rplA,rplL,rpoB,rpsL,rpsG,fusA1,tufB,rpsF,rpoS,rpsP,rpsI,rpsO,VC_0870,VC_0876,rpmE2,rpmJ2,VC_0934,VC_0937,clpS,VC_1144,VC_1290,VC_1448,VC_1454,VC_1469,VC_1494,VC_1653,infA,fabV,VC_1915,folD,fabF,VC_2022,fabH1,tsf,rpsB,rpsD,rpsK,rpsM,rpsE,rpsH,rpsN,rpsQ,rplP,rpsC,rpsS,rplD,rplC,rpsJ,pckA,add,blc
GO:0006807	Nitrogen compound metabolic process	57	1009	0.24	0.00038	hemC,lysA,dapF,rpmB,rpmG,rfbA,tufA,rplK,rplA,rplL,rpoB,rpsL,rpsG,fusA1,tufB,rpsF,gshB,rpoS,rpsP,rpsI,lpoA,rpsO,VC_0870,VC_0876,rpmE2,rpmJ2,VC_0937,clpS,VC_1144,VC_1290,VC_1363,VC_1448,VC_1454,VC_1469,VC_1494,VC_1653,infA,VC_1915,folD,tsf,rpsB,VC_2561,rpsD,rpsK,rpsM,rpsE,rpsH,rpsN,rpsQ,rplP,rpsC,rpsS,rplD,rplC,rpsJ,add,fhs
GO:0006417	Regulation of translation	8	29	0.93	0.0012	tufA,rplA,fusA1,tufB,infA,tsf,rpsD,rplD
GO:0044237	Cellular metabolic process	60	1179	0.19	0.0039	hemC,lysA,dapF,rpmB,rpmG,VC_0225,rfbA,tufA,rplK,rplA,rplL,rpoB,rpsL,rpsG,fusA1,tufB,rpsF,gshB,rpoS,rpsP,rpsI,lpoA,rpsO,VC_0783,VC_0870,VC_0876,rpmE2,rpmJ2,VC_0934,VC_0937,VC_1290,VC_1363,VC_1454,VC_1469,VC_1653,infA,fabV,VC_1915,folD,fabF,VC_2022,fabH1,tsf,rpsB,VC_2561,rpsD,rpsK,rpsM,rpsE,rpsH,rpsN,rpsQ,rplP,rpsC,rpsS,rplD,rplC,rpsJ,add,fhs
GO:0043953	Protein transport by the Tat complex	4	4	1.49	0.004	tatA,tatB,tatC,tatA-2
Metabolic Functions (MF)
#term ID	term description	observed gene count	background gene count	strength	false discovery rate	matching proteins in network
GO:0003735	Structural constituent of ribosome	28	57	1.18	3.33e-19	rpmB,rpmG,rplK,rplA,rplL,rpsL,rpsG,rpsF,rpsP,rpsI,rpsO,rpmE2,rpmJ2,VC_1915,rpsB,rpsD,rpsK,rpsM,rpsE,rpsH,rpsN,rpsQ,rplP,rpsC,rpsS,rplD,rplC,rpsJ
GO:0019843	rRNA binding	19	45	1.11	9.86e-12	rplK,rplA,rpsL,rpsG,rpsF,rpsO,infA,rpsD,rpsK,rpsM,rpsE,rpsH,rpsN,rpsQ,rplP,rpsC,rpsS,rplD,rplC
GO:0003723	RNA binding	23	133	0.72	8.9e-08	rplK,rplA,rplL,rpsL,rpsG,rpsF,rpsI,rpsO,infA,VC_1915,rpsD,rpsK,rpsM,rpsE,rpsH,rpsN,rpsQ,rplP,rpsC,rpsS,rplD,rplC,rpsJ
GO:0003676	Nucleic acid binding	35	473	0.36	0.00097	VC_0016,tufA,rplK,rplA,rplL,rpoB,rpsL,rpsG,fusA1,tufB,rpsF,VC_0396,rpoS,rpsI,rpsO,VC_0870,VC_1290,VC_1454,VC_1696,infA,VC_1915,tsf,rpsD,rpsK,rpsM,rpsE,rpsH,rpsN,rpsQ,rplP,rpsC,rpsS,rplD,rplC,rpsJ
GO:0003729	mRNA binding	5	10	1.19	0.0159	rplL,rpsG,VC_1915,rpsK,rpsC
GO:0008135	Translation factor activity, RNA binding	5	13	1.07	0.036	tufA,fusA1,tufB,infA,tsf
GO:0097159	Organic cyclic compound binding	49	940	0.2	0.0373	VC_0016,lysA,rfbA,tufA,rplK,rplA,rplL,rpoB,rpsL,rpsG,fusA1,tufB,rpsF,VC_0396,gshB,rpoS,rpsI,rpsO,VC_0697,VC_0870,VC_0937,htpG,VC_1094,VC_1144,VC_1290,VC_1448,VC_1454,VC_1696,infA,fabV,VC_1915,tsf,VC_2344,rpsD,rpsK,rpsM,rpsE,rpsH,rpsN,rpsQ,rplP,rpsC,rpsS,rplD,rplC,rpsJ,pckA,VC_A0116,fhs
GO:1901363	Heterocyclic compound binding	49	940	0.2	0.0373	VC_0016,lysA,rfbA,tufA,rplK,rplA,rplL,rpoB,rpsL,rpsG,fusA1,tufB,rpsF,VC_0396,gshB,rpoS,rpsI,rpsO,VC_0697,VC_0870,VC_0937,htpG,VC_1094,VC_1144,VC_1290,VC_1448,VC_1454,VC_1696,infA,fabV,VC_1915,tsf,VC_2344,rpsD,rpsK,rpsM,rpsE,rpsH,rpsN,rpsQ,rplP,rpsC,rpsS,rplD,rplC,rpsJ,pckA,VC_A0116,fhs
GO:0003746	Translation elongation factor activity	4	8	1.19	0.0453	tufA,fusA1,tufB,tsf
Cellular Components
#term ID	term description	observed gene count	background gene count	strength	false discovery rate	matching proteins in network
GO:0005840	Ribosome	28	60	1.16	1.25e-19	rpmB,rpmG,rplK,rplA,rplL,rpsL,rpsG,rpsF,rpsP,rpsI,rpsO,rpmE2,rpmJ2,VC_1915,rpsB,rpsD,rpsK,rpsM,rpsE,rpsH,rpsN,rpsQ,rplP,rpsC,rpsS,rplD,rplC,rpsJ
GO:0043232	Intracellular non-membrane-bounded organelle	29	78	1.06	1.69e-18	rpmB,rpmG,rplK,rplA,rplL,rpsL,rpsG,rpsF,rpsP,rpsI,rpsO,rpmE2,rpmJ2,VC_1915,rpsB,rpsD,rpsK,rpsM,rpsE,rpsH,rpsN,rpsQ,rplP,rpsC,rpsS,rplD,rplC,rpsJ,VC_A0283
GO:0044391	Ribosomal subunit	25	50	1.19	2.31e-18	rpmB,rpmG,rplK,rplA,rplL,rpsL,rpsG,rpsF,rpsP,rpsI,rpsO,VC_1915,rpsB,rpsD,rpsK,rpsM,rpsE,rpsH,rpsN,rpsQ,rplP,rpsC,rpsS,rplC,rpsJ
GO:0015935	Small ribosomal subunit	18	22	1.4	5.37e-16	rpsL,rpsG,rpsF,rpsP,rpsI,rpsO,VC_1915,rpsB,rpsD,rpsK,rpsM,rpsE,rpsH,rpsN,rpsQ,rpsC,rpsS,rpsJ
GO:0022626	Cytosolic ribosome	19	42	1.14	1.52e-13	rpmB,rpmG,rplK,rplA,rplL,rpsG,rpsF,rpsI,rpsO,VC_1915,rpsB,rpsK,rpsE,rpsH,rpsQ,rplP,rpsC,rpsS,rplC
GO:0022627	Cytosolic small ribosomal subunit	12	15	1.39	1.21e-10	rpsG,rpsF,rpsI,rpsO,VC_1915,rpsB,rpsK,rpsE,rpsH,rpsQ,rpsC,rpsS
GO:0032991	Protein-containing complex	33	274	0.57	1.89e-09	tatA,tatB,tatC,rpmB,rpmG,rplK,rplA,rplL,rpoB,rpsL,rpsG,rpsF,rpsP,rpsI,rpsO,VC_1091,VC_1448,VC_1915,rpsB,rpsD,rpsK,rpsM,rpsE,rpsH,rpsN,rpsQ,rplP,rpsC,rpsS,rplC,rpsJ,VC_A0283,tatA-2
GO:0005622	Intracellular anatomical structure	50	882	0.24	0.00036	hemC,dapF,rpmB,rpmG,VC_0225,tufA,rplK,rplA,rplL,rpsL,rpsG,fusA1,tufB,rpsF,gshB,rpoS,rpsP,rpsI,rpsO,rpmE2,rpmJ2,htpG,VC_1144,VC_1290,infA,VC_1915,folD,fabF,VC_2022,fabH1,tsf,rpsB,rpsD,rpsK,rpsM,rpsE,rpsH,rpsN,rpsQ,rplP,rpsC,rpsS,rplD,rplC,rpsJ,pckA,add,VC_A0283,blc,fhs
GO:0005829	Cytosol	32	452	0.34	0.00036	dapF,rpmB,rpmG,VC_0225,rplK,rplA,rplL,rpsG,fusA1,rpsF,rpsI,rpsO,htpG,VC_1290,infA,VC_1915,folD,fabF,VC_2022,rpsB,rpsK,rpsM,rpsE,rpsH,rpsQ,rplP,rpsC,rpsS,rplC,pckA,add,fhs
GO:0033281	TAT protein transport complex	4	4	1.49	0.00076	tatA,tatB,tatC,tatA-2
GO:0022625	Cytosolic large ribosomal subunit	7	27	0.9	0.00083	rpmB,rpmG,rplK,rplA,rplL,rplP,rplC
GO:0005737	Cytoplasm	44	845	0.2	0.0071	hemC,dapF,rpmB,rpmG,VC_0225,tufA,rplK,rplA,rplL,rpsG,fusA1,tufB,rpsF,gshB,rpoS,rpsP,rpsI,rpsO,htpG,VC_1144,VC_1290,infA,VC_1915,folD,fabF,VC_2022,fabH1,tsf,rpsB,rpsK,rpsM,rpsE,rpsH,rpsN,rpsQ,rplP,rpsC,rpsS,rplD,rplC,pckA,add,blc,fhs
KEGG terms (KEGG)
#term ID	term description	observed gene count	background gene count	strength	false discovery rate	matching proteins in network
map03010	Ribosome	28	59	1.16	6.13e-20	rpmB,rpmG,rplK,rplA,rplL,rpsL,rpsG,rpsF,rpsP,rpsI,rpsO,rpmE2,rpmJ2,VC_1915,rpsB,rpsD,rpsK,rpsM,rpsE,rpsH,rpsN,rpsQ,rplP,rpsC,rpsS,rplD,rplC,rpsJ
map00061	Fatty acid biosynthesis	5	19	0.91	0.0474	fabV,VC_1739,fabF,VC_2022,fabH1
map03070	Bacterial secretion system	9	72	0.58	0.0474	tatA,tatB,tatC,VC_1144,VC_1415,VC_1447,VC_A0017,VC_A0116,tatA-2
